# Supplementary material for: An efficient and green synthesis of ferrocenyl-quinoline conjugates via a TsOH-catalyzed three-component reaction in water
Source: Royal Society of Chemistry journal article supplement (doi:10.1039/c8ra01004h), 2018-01-01

## Supplementary Information

for

# **An efficient and green synthesis of ferrocenyl-quinoline conjugates *via* a TsOH-catalyzed three-component reaction in water**

Rui-Qi Mou, Mei Zhao, Xue-Xin Lv, Sheng-Yan Zhang and Dian-Shun Guo \*

*College of Chemistry, Chemical Engineering and Materials Science, Collaborative  
Innovation Center of Functionalized Probes for Chemical Imaging in Universities of  
Shandong, Shandong Normal University, Jinan 250014, P. R. China.*

*Email: chdsguo@sdu.edu.cn;*

## Contents

|                                                                |     |
|----------------------------------------------------------------|-----|
| 1. Synthesis of <b>4</b> in EtOH .....                         | S3  |
| 2. Crystallographic data of <b>4a</b> and <b>4k</b> .....      | S4  |
| 3. Hirshfeld surface analysis of <b>4a</b> and <b>4k</b> ..... | S15 |
| 4. Electrochemistry of <b>4</b> .....                          | S17 |
| 5. UV-vis properties of <b>4</b> .....                         | S17 |
| 6. Supplementary experiments for the mechanism .....           | S19 |
| 7. NMR spectra .....                                           | S21 |

## 1. Synthesis of **4** in EtOH

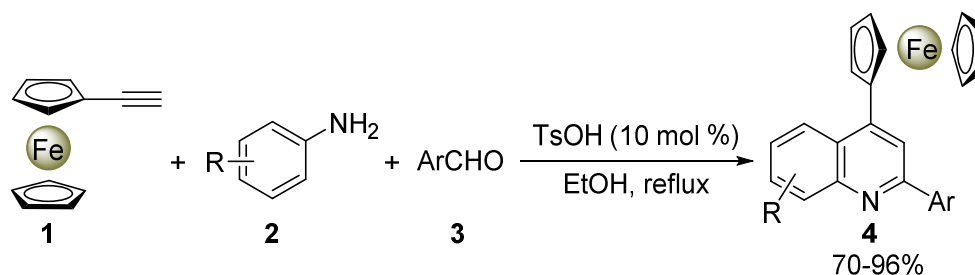

General procedure:

A solution of aldehyde (1.0 mmol), amine (1.0 mmol), ferrocenylacetylene (1.1 mmol) and TsOH (0.1 mmol) in EtOH (1.0 mL) was stirred at refluxing under air. When the reaction completed (monitored by TLC), the resulting mixture was cooled to room temperature and extracted with ethyl acetate. The organic phase was washed with saturated sodium bicarbonate solution and brine, and then dried over anhydrous MgSO<sub>4</sub>. The volatile was evaporated under reduced pressure, and the residue was subjected to the flash column chromatography (silica-gel), to afford products **4a-4t**. The results are summarized in Table S1.

**Table S1** Synthetic results of **4** in EtOH

| Compd.    | T/°C | t/h | Yield/% | Compd.     | T/°C | t/h | Yield/% |
|-----------|------|-----|---------|------------|------|-----|---------|
| <b>4a</b> | 78   | 2   | 93      | <b>4k'</b> | 78   | 2   | 55      |
| <b>4b</b> | 78   | 2   | 96      | <b>4l</b>  | 78   | 2   | 80      |
| <b>4c</b> | 78   | 2   | 93      | <b>4m</b>  | 78   | 2   | 93      |
| <b>4d</b> | 78   | 2   | 81      | <b>4n</b>  | 78   | 2   | 89      |
| <b>4e</b> | 78   | 2   | 88      | <b>4o</b>  | 78   | 2   | 85      |
| <b>4f</b> | 78   | 3   | 70      | <b>4p</b>  | 78   | 3   | 72      |
| <b>4g</b> | 78   | 2.5 | 81      | <b>4q</b>  | 78   | 2   | 90      |
| <b>4h</b> | 78   | 2.5 | 82      | <b>4r</b>  | 78   | 2   | 89      |
| <b>4i</b> | 78   | 2.5 | 75      | <b>4s</b>  | 78   | 2   | 82      |
| <b>4j</b> | 78   | 2   | 93      | <b>4t</b>  | 78   | 2.5 | 80      |
| <b>4k</b> | 78   | 2   | 37      |            |      |     |         |

## 2. Crystallographic data of **4a** and **4k**

**Table S2** Crystallographic and refinement data of **4a** and **4k**

| Code                                                           | <b>4a</b>                           | <b>4k</b>                           |
|----------------------------------------------------------------|-------------------------------------|-------------------------------------|
| Empirical formula                                              | C <sub>25</sub> H <sub>19</sub> FeN | C <sub>26</sub> H <sub>21</sub> FeN |
| Formula weight                                                 | 389.26                              | 403.29                              |
| Temperature (K)                                                | 100 K                               | 100 K                               |
| Wavelength (Å)                                                 | 0.71073                             | 1.54184                             |
| Crystal system                                                 | Monoclinic                          | Monoclinic                          |
| Space group                                                    | <i>P21/n</i>                        | <i>P21/n</i>                        |
| a (Å)                                                          | 7.3370 (3)                          | 8.36603(17)                         |
| b (Å)                                                          | 10.4908(4)                          | 20.5582(4)                          |
| c (Å)                                                          | 23.2831(9)                          | 11.3490(2)                          |
| $\beta$ (°)                                                    | 95.626(3)                           | 107.835                             |
| Volume (Å <sup>3</sup> )                                       | 1783.49 (12)                        | 1858.12(6)                          |
| Z                                                              | 4                                   | 4                                   |
| Density (mg/m <sup>3</sup> )                                   | 1.450                               | 1.442                               |
| $\mu$ (mm <sup>-1</sup> )                                      | 0.85                                | 6.57                                |
| F(000)                                                         | 808                                 | 840                                 |
| Crystal size (mm)                                              | 0.38×0.16×0.12                      | 0.24×0.17×0.09                      |
| $\theta$ range (°)                                             | 3.9 to 28.7                         | 4.3 to 71.0                         |
| Collected reflections                                          | 7550                                | 6994                                |
| Independent reflections                                        | 3375                                | 3490                                |
| Observed reflections [ $I > 2\sigma(I)$ ]                      | 2978                                | 3136                                |
| Goodness-of-fit on $F^2$                                       | 1.055                               | 1.015                               |
| Final R indices [ $I > 2\sigma(I)$ ]                           | $R = 0.0336$ , $wR = 0.0840$        | $R = 0.0365$ , $wR = 0.0899$        |
| R indices (all data)                                           | $R = 0.0388$ , $wR = 0.0878$        | $R = 0.0420$ , $wR = 0.0928$        |
| ( $\Delta\rho$ )max, ( $\Delta\rho$ )min (e. Å <sup>-3</sup> ) | 0.27, -0.44                         | 0.44, -0.65                         |

**Table S3** Bond lengths (Å), bond angles (°) and torsion angles (°) for **4a**

|           |             |             |             |
|-----------|-------------|-------------|-------------|
| C1—H1     | 0.9800      | C10—Fe1     | 2.041 (2)   |
| C1—C2     | 1.422 (3)   | C11—C12     | 1.377 (3)   |
| C1—C5     | 1.438 (3)   | C11—C25     | 1.431 (3)   |
| C1—Fe1    | 2.046 (2)   | C12—H12     | 0.9300      |
| C2—H2     | 0.9800      | C12—C13     | 1.416 (3)   |
| C2—C3     | 1.420 (3)   | C13—C14     | 1.494 (3)   |
| C2—Fe1    | 2.045 (2)   | C13—N1      | 1.329 (3)   |
| C3—H3     | 0.9800      | C14—C15     | 1.396 (3)   |
| C3—C4     | 1.421 (3)   | C14—C19     | 1.397 (3)   |
| C3—Fe1    | 2.043 (2)   | C15—H15     | 0.9300      |
| C4—H4     | 0.9800      | C15—C16     | 1.390 (3)   |
| C4—C5     | 1.438 (3)   | C16—H16     | 0.9300      |
| C4—Fe1    | 2.043 (2)   | C16—C17     | 1.385 (3)   |
| C5—C11    | 1.478 (3)   | C17—H17     | 0.9300      |
| C5—Fe1    | 2.0544 (19) | C17—C18     | 1.387 (3)   |
| C6—H6     | 0.9800      | C18—H18     | 0.9300      |
| C6—C7     | 1.419 (3)   | C18—C19     | 1.385 (3)   |
| C6—C10    | 1.421 (3)   | C19—H19     | 0.9300      |
| C6—Fe1    | 2.042 (2)   | C20—C21     | 1.419 (3)   |
| C7—H7     | 0.9800      | C20—C25     | 1.429 (3)   |
| C7—C8     | 1.421 (3)   | C20—N1      | 1.366 (3)   |
| C7—Fe1    | 2.049 (2)   | C21—H21     | 0.9300      |
| C8—H8     | 0.9800      | C21—C22     | 1.364 (3)   |
| C8—C9     | 1.421 (3)   | C22—H22     | 0.9300      |
| C8—Fe1    | 2.051 (2)   | C22—C23     | 1.410 (3)   |
| C9—H9     | 0.9800      | C23—H23     | 0.9300      |
| C9—C10    | 1.421 (3)   | C23—C24     | 1.369 (3)   |
| C9—Fe1    | 2.042 (2)   | C24—H24     | 0.9300      |
| C10—H10   | 0.9800      | C24—C25     | 1.418 (3)   |
|           |             |             |             |
| C2—C1—H1  | 125.8       | C17—C16—C15 | 120.0 (2)   |
| C2—C1—C5  | 108.39 (19) | C17—C16—H16 | 120.0       |
| C2—C1—Fe1 | 69.64 (12)  | C16—C17—H17 | 120.1       |
| C5—C1—H1  | 125.8       | C16—C17—C18 | 119.7 (2)   |
| C5—C1—Fe1 | 69.80 (12)  | C18—C17—H17 | 120.1       |
| Fe1—C1—H1 | 125.8       | C17—C18—H18 | 119.9       |
| C1—C2—H2  | 125.9       | C19—C18—C17 | 120.2 (2)   |
| C1—C2—Fe1 | 69.69 (12)  | C19—C18—H18 | 119.9       |
| C3—C2—C1  | 108.27 (19) | C14—C19—H19 | 119.5       |
| C3—C2—H2  | 125.9       | C18—C19—C14 | 120.9 (2)   |
| C3—C2—Fe1 | 69.59 (12)  | C18—C19—H19 | 119.5       |
| Fe1—C2—H2 | 125.9       | C21—C20—C25 | 119.14 (19) |

|            |             |             |             |
|------------|-------------|-------------|-------------|
| C2—C3—H3   | 125.9       | N1—C20—C21  | 117.19 (18) |
| C2—C3—C4   | 108.11 (19) | N1—C20—C25  | 123.67 (19) |
| C2—C3—Fe1  | 69.77 (12)  | C20—C21—H21 | 119.5       |
| C4—C3—H3   | 125.9       | C22—C21—C20 | 120.92 (19) |
| C4—C3—Fe1  | 69.65 (12)  | C22—C21—H21 | 119.5       |
| Fe1—C3—H3  | 125.9       | C21—C22—H22 | 119.9       |
| C3—C4—H4   | 125.7       | C21—C22—C23 | 120.3 (2)   |
| C3—C4—C5   | 108.52 (19) | C23—C22—H22 | 119.9       |
| C3—C4—Fe1  | 69.65 (12)  | C22—C23—H23 | 119.9       |
| C5—C4—H4   | 125.7       | C24—C23—C22 | 120.3 (2)   |
| C5—C4—Fe1  | 69.89 (11)  | C24—C23—H23 | 119.9       |
| Fe1—C4—H4  | 125.7       | C23—C24—H24 | 119.3       |
| C1—C5—C4   | 106.71 (18) | C23—C24—C25 | 121.33 (19) |
| C1—C5—C11  | 128.99 (19) | C25—C24—H24 | 119.3       |
| C1—C5—Fe1  | 69.15 (11)  | C20—C25—C11 | 117.20 (18) |
| C4—C5—C11  | 124.11 (18) | C24—C25—C11 | 124.71 (18) |
| C4—C5—Fe1  | 69.02 (11)  | C24—C25—C20 | 118.06 (18) |
| C11—C5—Fe1 | 130.54 (14) | C1—Fe1—C5   | 41.05 (8)   |
| C7—C6—H6   | 125.8       | C1—Fe1—C7   | 124.99 (9)  |
| C7—C6—C10  | 108.4 (2)   | C1—Fe1—C8   | 109.34 (9)  |
| C7—C6—Fe1  | 69.98 (13)  | C2—Fe1—C1   | 40.67 (8)   |
| C10—C6—H6  | 125.8       | C2—Fe1—C5   | 68.89 (8)   |
| C10—C6—Fe1 | 69.59 (12)  | C2—Fe1—C7   | 107.42 (9)  |
| Fe1—C6—H6  | 125.8       | C2—Fe1—C8   | 122.56 (9)  |
| C6—C7—H7   | 126.0       | C3—Fe1—C1   | 68.55 (9)   |
| C6—C7—C8   | 107.9 (2)   | C3—Fe1—C2   | 40.64 (9)   |
| C6—C7—Fe1  | 69.44 (13)  | C3—Fe1—C5   | 68.99 (8)   |
| C8—C7—H7   | 126.0       | C3—Fe1—C7   | 120.30 (9)  |
| C8—C7—Fe1  | 69.77 (12)  | C3—Fe1—C8   | 156.75 (9)  |
| Fe1—C7—H7  | 126.0       | C4—Fe1—C1   | 68.70 (9)   |
| C7—C8—H8   | 126.1       | C4—Fe1—C2   | 68.46 (9)   |
| C7—C8—Fe1  | 69.66 (12)  | C4—Fe1—C3   | 40.70 (8)   |
| C9—C8—C7   | 107.8 (2)   | C4—Fe1—C5   | 41.09 (8)   |
| C9—C8—H8   | 126.1       | C4—Fe1—C7   | 155.35 (9)  |
| C9—C8—Fe1  | 69.38 (12)  | C4—Fe1—C8   | 161.97 (9)  |
| Fe1—C8—H8  | 126.1       | C6—Fe1—C1   | 160.48 (9)  |
| C8—C9—H9   | 125.8       | C6—Fe1—C2   | 122.98 (9)  |
| C8—C9—C10  | 108.35 (19) | C6—Fe1—C3   | 105.59 (9)  |
| C8—C9—Fe1  | 69.99 (12)  | C6—Fe1—C4   | 119.79 (9)  |
| C10—C9—H9  | 125.8       | C6—Fe1—C5   | 156.12 (10) |
| C10—C9—Fe1 | 69.58 (12)  | C6—Fe1—C7   | 40.58 (10)  |
| Fe1—C9—H9  | 125.8       | C6—Fe1—C8   | 68.27 (9)   |
| C6—C10—C9  | 107.5 (2)   | C6—Fe1—C9   | 68.29 (9)   |

|               |              |               |              |
|---------------|--------------|---------------|--------------|
| C6—C10—H10    | 126.2        | C7—Fe1—C5     | 162.22 (9)   |
| C6—C10—Fe1    | 69.67 (13)   | C7—Fe1—C8     | 40.57 (9)    |
| C9—C10—H10    | 126.2        | C8—Fe1—C5     | 125.65 (8)   |
| C9—C10—Fe1    | 69.69 (12)   | C9—Fe1—C1     | 123.41 (9)   |
| Fe1—C10—H10   | 126.2        | C9—Fe1—C2     | 158.63 (9)   |
| C12—C11—C5    | 117.87 (18)  | C9—Fe1—C3     | 159.94 (9)   |
| C12—C11—C25   | 117.43 (18)  | C9—Fe1—C4     | 124.35 (8)   |
| C25—C11—C5    | 124.69 (18)  | C9—Fe1—C5     | 108.42 (8)   |
| C11—C12—H12   | 119.1        | C9—Fe1—C7     | 68.29 (9)    |
| C11—C12—C13   | 121.72 (19)  | C9—Fe1—C8     | 40.63 (8)    |
| C13—C12—H12   | 119.1        | C10—Fe1—C1    | 158.12 (9)   |
| C12—C13—C14   | 121.03 (19)  | C10—Fe1—C2    | 159.14 (9)   |
| N1—C13—C12    | 121.98 (19)  | C10—Fe1—C3    | 122.31 (9)   |
| N1—C13—C14    | 116.99 (18)  | C10—Fe1—C4    | 106.21 (9)   |
| C15—C14—C13   | 122.01 (18)  | C10—Fe1—C5    | 121.20 (9)   |
| C15—C14—C19   | 118.21 (19)  | C10—Fe1—C6    | 40.74 (9)    |
| C19—C14—C13   | 119.77 (19)  | C10—Fe1—C7    | 68.54 (9)    |
| C14—C15—H15   | 119.5        | C10—Fe1—C8    | 68.56 (9)    |
| C16—C15—C14   | 120.9 (2)    | C10—Fe1—C9    | 40.74 (9)    |
| C16—C15—H15   | 119.5        | C13—N1—C20    | 117.97 (17)  |
| C15—C16—H16   | 120.0        |               |              |
|               |              |               |              |
| C1—C2—C3—C4   | 0.2 (2)      | C7—C6—Fe1—C4  | 160.31 (13)  |
| C1—C2—C3—Fe1  | -59.14 (14)  | C7—C6—Fe1—C5  | -168.16 (18) |
| C1—C2—Fe1—C3  | 119.64 (17)  | C7—C6—Fe1—C8  | -37.65 (13)  |
| C1—C2—Fe1—C4  | 81.96 (13)   | C7—C6—Fe1—C9  | -81.54 (14)  |
| C1—C2—Fe1—C5  | 37.71 (12)   | C7—C6—Fe1—C10 | -119.59 (19) |
| C1—C2—Fe1—C6  | -165.67 (13) | C7—C8—C9—C10  | -0.1 (2)     |
| C1—C2—Fe1—C7  | -123.85 (13) | C7—C8—C9—Fe1  | -59.27 (15)  |
| C1—C2—Fe1—C8  | -81.95 (14)  | C7—C8—Fe1—C1  | -121.64 (14) |
| C1—C2—Fe1—C9  | -49.0 (3)    | C7—C8—Fe1—C2  | -78.49 (16)  |
| C1—C2—Fe1—C10 | 160.8 (2)    | C7—C8—Fe1—C3  | -41.1 (3)    |
| C1—C5—C11—C12 | 142.1 (2)    | C7—C8—Fe1—C4  | 157.9 (3)    |
| C1—C5—C11—C25 | -37.2 (3)    | C7—C8—Fe1—C5  | -164.60 (13) |
| C1—C5—Fe1—C2  | -37.37 (12)  | C7—C8—Fe1—C6  | 37.66 (14)   |
| C1—C5—Fe1—C3  | -81.06 (13)  | C7—C8—Fe1—C9  | 119.21 (19)  |
| C1—C5—Fe1—C4  | -118.39 (17) | C7—C8—Fe1—C10 | 81.62 (15)   |
| C1—C5—Fe1—C6  | -162.1 (2)   | C8—C7—Fe1—C1  | 78.69 (15)   |
| C1—C5—Fe1—C7  | 43.8 (3)     | C8—C7—Fe1—C2  | 120.04 (14)  |
| C1—C5—Fe1—C8  | 78.29 (14)   | C8—C7—Fe1—C3  | 162.50 (13)  |
| C1—C5—Fe1—C9  | 120.09 (12)  | C8—C7—Fe1—C4  | -163.77 (19) |
| C1—C5—Fe1—C10 | 163.04 (12)  | C8—C7—Fe1—C5  | 45.0 (3)     |
| C2—C1—C5—C4   | 0.1 (2)      | C8—C7—Fe1—C6  | -119.25 (19) |

|               |              |               |              |
|---------------|--------------|---------------|--------------|
| C2—C1—C5—C11  | -174.9 (2)   | C8—C7—Fe1—C9  | -37.72 (13)  |
| C2—C1—C5—Fe1  | 59.14 (14)   | C8—C7—Fe1—C10 | -81.68 (14)  |
| C2—C1—Fe1—C3  | -37.46 (12)  | C8—C9—C10—C6  | 0.2 (2)      |
| C2—C1—Fe1—C4  | -81.32 (13)  | C8—C9—C10—Fe1 | -59.46 (15)  |
| C2—C1—Fe1—C5  | -119.67 (17) | C8—C9—Fe1—C1  | -80.82 (15)  |
| C2—C1—Fe1—C6  | 38.4 (3)     | C8—C9—Fe1—C2  | -44.7 (3)    |
| C2—C1—Fe1—C7  | 75.29 (15)   | C8—C9—Fe1—C3  | 157.2 (2)    |
| C2—C1—Fe1—C8  | 117.81 (13)  | C8—C9—Fe1—C4  | -166.45 (13) |
| C2—C1—Fe1—C9  | 160.76 (12)  | C8—C9—Fe1—C5  | -123.72 (13) |
| C2—C1—Fe1—C10 | -161.7 (2)   | C8—C9—Fe1—C6  | 81.49 (14)   |
| C2—C3—C4—C5   | -0.1 (2)     | C8—C9—Fe1—C7  | 37.66 (13)   |
| C2—C3—C4—Fe1  | -59.38 (15)  | C8—C9—Fe1—C10 | 119.54 (18)  |
| C2—C3—Fe1—C1  | 37.49 (12)   | C9—C8—Fe1—C1  | 119.15 (13)  |
| C2—C3—Fe1—C4  | 119.34 (18)  | C9—C8—Fe1—C2  | 162.30 (12)  |
| C2—C3—Fe1—C5  | 81.67 (13)   | C9—C8—Fe1—C3  | -160.3 (2)   |
| C2—C3—Fe1—C6  | -122.86 (13) | C9—C8—Fe1—C4  | 38.7 (3)     |
| C2—C3—Fe1—C7  | -81.46 (15)  | C9—C8—Fe1—C5  | 76.19 (15)   |
| C2—C3—Fe1—C8  | -51.8 (3)    | C9—C8—Fe1—C6  | -81.55 (14)  |
| C2—C3—Fe1—C9  | 168.0 (2)    | C9—C8—Fe1—C7  | -119.21 (19) |
| C2—C3—Fe1—C10 | -163.89 (12) | C9—C8—Fe1—C10 | -37.59 (13)  |
| C3—C2—Fe1—C1  | -119.64 (17) | C9—C10—Fe1—C1 | -51.2 (3)    |
| C3—C2—Fe1—C4  | -37.67 (12)  | C9—C10—Fe1—C2 | 163.9 (2)    |
| C3—C2—Fe1—C5  | -81.93 (13)  | C9—C10—Fe1—C3 | -165.64 (12) |
| C3—C2—Fe1—C6  | 74.69 (15)   | C9—C10—Fe1—C4 | -124.26 (13) |
| C3—C2—Fe1—C7  | 116.51 (13)  | C9—C10—Fe1—C5 | -82.12 (14)  |
| C3—C2—Fe1—C8  | 158.42 (13)  | C9—C10—Fe1—C6 | 118.66 (19)  |
| C3—C2—Fe1—C9  | -168.7 (2)   | C9—C10—Fe1—C7 | 81.23 (14)   |
| C3—C2—Fe1—C10 | 41.2 (3)     | C9—C10—Fe1—C8 | 37.49 (13)   |
| C3—C4—C5—C1   | 0.0 (2)      | C10—C6—C7—C8  | 0.2 (3)      |
| C3—C4—C5—C11  | 175.35 (19)  | C10—C6—C7—Fe1 | -59.19 (15)  |
| C3—C4—C5—Fe1  | -59.12 (14)  | C10—C6—Fe1—C1 | 168.7 (2)    |
| C3—C4—Fe1—C1  | 81.46 (14)   | C10—C6—Fe1—C2 | -162.47 (13) |
| C3—C4—Fe1—C2  | 37.62 (13)   | C10—C6—Fe1—C3 | -121.76 (14) |
| C3—C4—Fe1—C5  | 119.78 (18)  | C10—C6—Fe1—C4 | -80.11 (15)  |
| C3—C4—Fe1—C6  | -79.02 (15)  | C10—C6—Fe1—C5 | -48.6 (3)    |
| C3—C4—Fe1—C7  | -47.3 (3)    | C10—C6—Fe1—C7 | 119.59 (19)  |
| C3—C4—Fe1—C8  | 168.6 (3)    | C10—C6—Fe1—C8 | 81.94 (14)   |
| C3—C4—Fe1—C9  | -161.84 (13) | C10—C6—Fe1—C9 | 38.05 (13)   |
| C3—C4—Fe1—C10 | -121.04 (14) | C10—C9—Fe1—C1 | 159.64 (13)  |
| C4—C3—Fe1—C1  | -81.85 (13)  | C10—C9—Fe1—C2 | -164.2 (2)   |
| C4—C3—Fe1—C2  | -119.34 (18) | C10—C9—Fe1—C3 | 37.7 (3)     |
| C4—C3—Fe1—C5  | -37.67 (13)  | C10—C9—Fe1—C4 | 74.01 (15)   |
| C4—C3—Fe1—C6  | 117.81 (14)  | C10—C9—Fe1—C5 | 116.74 (13)  |



|               |              |                 |              |
|---------------|--------------|-----------------|--------------|
| C4—C3—Fe1—C7  | 159.20 (13)  | C10—C9—Fe1—C6   | -38.05 (13)  |
| C4—C3—Fe1—C8  | -171.1 (2)   | C10—C9—Fe1—C7   | -81.88 (14)  |
| C4—C3—Fe1—C9  | 48.6 (3)     | C10—C9—Fe1—C8   | -119.54 (18) |
| C4—C3—Fe1—C10 | 76.77 (15)   | C11—C5—Fe1—C1   | -124.1 (2)   |
| C4—C5—C11—C12 | -32.2 (3)    | C11—C5—Fe1—C2   | -161.4 (2)   |
| C4—C5—C11—C25 | 148.5 (2)    | C11—C5—Fe1—C3   | 154.9 (2)    |
| C4—C5—Fe1—C1  | 118.39 (17)  | C11—C5—Fe1—C4   | 117.5 (2)    |
| C4—C5—Fe1—C2  | 81.02 (13)   | C11—C5—Fe1—C6   | 73.9 (3)     |
| C4—C5—Fe1—C3  | 37.32 (13)   | C11—C5—Fe1—C7   | -80.2 (3)    |
| C4—C5—Fe1—C6  | -43.7 (3)    | C11—C5—Fe1—C8   | -45.8 (2)    |
| C4—C5—Fe1—C7  | 162.2 (3)    | C11—C5—Fe1—C9   | -4.0 (2)     |
| C4—C5—Fe1—C8  | -163.33 (13) | C11—C5—Fe1—C10  | 39.0 (2)     |
| C4—C5—Fe1—C9  | -121.53 (13) | C11—C12—C13—C14 | 177.64 (19)  |
| C4—C5—Fe1—C10 | -78.58 (14)  | C11—C12—C13—N1  | -1.9 (3)     |
| C5—C1—C2—C3   | -0.2 (2)     | C12—C11—C25—C20 | 0.1 (3)      |
| C5—C1—C2—Fe1  | -59.24 (14)  | C12—C11—C25—C24 | 178.30 (19)  |
| C5—C1—Fe1—C2  | 119.67 (17)  | C12—C13—C14—C15 | -12.4 (3)    |
| C5—C1—Fe1—C3  | 82.21 (13)   | C12—C13—C14—C19 | 167.90 (19)  |

**Table S4** Bond lengths (Å), bond angles (°) and torsion angles (°) for **4k**

|        |             |          |           |
|--------|-------------|----------|-----------|
| C1—H1  | 0.9800      | C11—C20  | 1.373 (3) |
| C1—C2  | 1.423 (3)   | C12—C13  | 1.440 (3) |
| C1—C5  | 1.428 (3)   | C12—C18  | 1.432 (3) |
| C1—Fe1 | 2.056 (2)   | C13—C14  | 1.509 (3) |
| C2—H2  | 0.9800      | C13—C15  | 1.370 (3) |
| C2—C3  | 1.423 (3)   | C14—H14A | 0.9600    |
| C2—Fe1 | 2.042 (2)   | C14—H14B | 0.9600    |
| C3—H3  | 0.9800      | C14—H14C | 0.9600    |
| C3—C4  | 1.424 (3)   | C15—H15  | 0.9300    |
| C3—Fe1 | 2.031 (2)   | C15—C16  | 1.404 (3) |
| C4—H4  | 0.9800      | C16—H16  | 0.9300    |
| C4—C5  | 1.431 (3)   | C16—C17  | 1.360 (3) |
| C4—Fe1 | 2.044 (2)   | C17—H17  | 0.9300    |
| C5—C11 | 1.488 (3)   | C17—C18  | 1.415 (3) |
| C5—Fe1 | 2.0800 (19) | C18—N1   | 1.369 (3) |
| C6—H6  | 0.9800      | C19—C20  | 1.413 (3) |
| C6—C7  | 1.416 (3)   | C19—C21  | 1.486 (3) |
| C6—C10 | 1.418 (4)   | C19—N1   | 1.320 (3) |
| C6—Fe1 | 2.060 (2)   | C20—H20  | 0.9300    |
| C7—H7  | 0.9800      | C21—C22  | 1.395 (3) |
| C7—C8  | 1.417 (3)   | C21—C26  | 1.396 (3) |
| C7—Fe1 | 2.058 (2)   | C22—H22  | 0.9300    |

|            |             |             |             |
|------------|-------------|-------------|-------------|
| C8—H8      | 0.9800      | C22—C23     | 1.387 (3)   |
| C8—C9      | 1.420 (4)   | C23—H23     | 0.9300      |
| C8—Fe1     | 2.037 (2)   | C23—C24     | 1.387 (3)   |
| C9—H9      | 0.9800      | C24—H24     | 0.9300      |
| C9—C10     | 1.407 (4)   | C24—C25     | 1.385 (3)   |
| C9—Fe1     | 2.034 (2)   | C25—H25     | 0.9300      |
| C10—H10    | 0.9800      | C25—C26     | 1.388 (3)   |
| C10—Fe1    | 2.049 (2)   | C26—H26     | 0.9300      |
| C11—C12    | 1.439 (3)   |             |             |
| C2—C1—H1   | 125.9       | C17—C16—C15 | 119.7 (2)   |
| C2—C1—C5   | 108.30 (18) | C17—C16—H16 | 120.2       |
| C2—C1—Fe1  | 69.14 (12)  | C16—C17—H17 | 119.8       |
| C5—C1—H1   | 125.9       | C16—C17—C18 | 120.4 (2)   |
| C5—C1—Fe1  | 70.73 (11)  | C18—C17—H17 | 119.8       |
| Fe1—C1—H1  | 125.9       | C17—C18—C12 | 120.50 (19) |
| C1—C2—H2   | 125.9       | N1—C18—C12  | 124.17 (18) |
| C1—C2—Fe1  | 70.20 (12)  | N1—C18—C17  | 115.32 (19) |
| C3—C2—C1   | 108.15 (18) | C20—C19—C21 | 120.66 (17) |
| C3—C2—H2   | 125.9       | N1—C19—C20  | 121.82 (19) |
| C3—C2—Fe1  | 69.14 (12)  | N1—C19—C21  | 117.42 (18) |
| Fe1—C2—H2  | 125.9       | C11—C20—C19 | 121.58 (18) |
| C2—C3—H3   | 126.1       | C11—C20—H20 | 119.2       |
| C2—C3—C4   | 107.84 (18) | C19—C20—H20 | 119.2       |
| C2—C3—Fe1  | 69.96 (12)  | C22—C21—C19 | 119.50 (17) |
| C4—C3—H3   | 126.1       | C22—C21—C26 | 118.19 (19) |
| C4—C3—Fe1  | 70.07 (12)  | C26—C21—C19 | 122.16 (19) |
| Fe1—C3—H3  | 126.1       | C21—C22—H22 | 119.5       |
| C3—C4—H4   | 125.8       | C23—C22—C21 | 121.00 (18) |
| C3—C4—C5   | 108.38 (18) | C23—C22—H22 | 119.5       |
| C3—C4—Fe1  | 69.04 (12)  | C22—C23—H23 | 119.9       |
| C5—C4—H4   | 125.8       | C22—C23—C24 | 120.1 (2)   |
| C5—C4—Fe1  | 71.04 (12)  | C24—C23—H23 | 119.9       |
| Fe1—C4—H4  | 125.8       | C23—C24—H24 | 120.3       |
| C1—C5—C4   | 107.31 (18) | C25—C24—C23 | 119.5 (2)   |
| C1—C5—C11  | 127.15 (18) | C25—C24—H24 | 120.3       |
| C1—C5—Fe1  | 68.89 (11)  | C24—C25—H25 | 119.8       |
| C4—C5—C11  | 125.36 (18) | C24—C25—C26 | 120.37 (19) |
| C4—C5—Fe1  | 68.36 (11)  | C26—C25—H25 | 119.8       |
| C11—C5—Fe1 | 131.73 (14) | C21—C26—H26 | 119.6       |
| C7—C6—H6   | 126.0       | C25—C26—C21 | 120.78 (19) |
| C7—C6—C10  | 108.1 (2)   | C25—C26—H26 | 119.6       |
| C7—C6—Fe1  | 69.81 (13)  | C1—Fe1—C5   | 40.38 (8)   |

|                    |                    |            |             |
|--------------------|--------------------|------------|-------------|
| C10—C6—H6          | 126.0              | C1—Fe1—C6  | 120.40 (9)  |
| C10—C6—Fe1         | 69.40 (14)         | C1—Fe1—C7  | 110.45 (9)  |
| Fe1—C6—H6          | 126.0              | C2—Fe1—C1  | 40.66 (8)   |
| C6—C7—H7           | 126.0              | C2—Fe1—C4  | 68.53 (8)   |
| C6—C7—C8           | 107.9 (2)          | C2—Fe1—C5  | 68.20 (8)   |
| C6—C7—Fe1          | 69.97 (13)         | C2—Fe1—C6  | 149.73 (10) |
| C8—C7—H7           | 126.0              | C2—Fe1—C7  | 115.14 (9)  |
| C8—C7—Fe1          | 68.97 (13)         | C2—Fe1—C10 | 166.10 (11) |
| Fe1—C7—H7          | 126.0              | C3—Fe1—C1  | 68.67 (8)   |
| C7—C8—H8           | 126.1              | C3—Fe1—C2  | 40.90 (8)   |
| C7—C8—C9           | 107.8 (2)          | C3—Fe1—C4  | 40.89 (8)   |
| C7—C8—Fe1          | 70.55 (12)         | C3—Fe1—C5  | 68.54 (8)   |
| C9—C8—H8           | 126.1              | C3—Fe1—C6  | 169.28 (9)  |
| C9—C8—Fe1          | 69.49 (13)         | C3—Fe1—C7  | 145.41 (9)  |
| Fe1—C8—H8          | 126.1              | C3—Fe1—C8  | 111.59 (9)  |
| C8—C9—H9           | 125.9              | C3—Fe1—C9  | 104.47 (10) |
| C8—C9—Fe1          | 69.69 (13)         | C3—Fe1—C10 | 129.00 (10) |
| C10—C9—C8          | 108.3 (2)          | C4—Fe1—C1  | 68.33 (8)   |
| C10—C9—H9          | 125.9              | C4—Fe1—C5  | 40.60 (8)   |
| C10—C9—Fe1         | 70.39 (14)         | C4—Fe1—C6  | 134.20 (9)  |
| Fe1—C9—H9          | 125.9              | C4—Fe1—C7  | 173.35 (9)  |
| C6—C10—H10         | 126.0              | C4—Fe1—C10 | 109.98 (9)  |
| C6—C10—Fe1         | 70.24 (13)         | C6—Fe1—C5  | 113.96 (9)  |
| C9—C10—C6          | 108.0 (2)          | C7—Fe1—C5  | 134.39 (9)  |
| C9—C10—H10         | 126.0              | C7—Fe1—C6  | 40.22 (9)   |
| C9—C10—Fe1         | 69.28 (15)         | C8—Fe1—C1  | 129.38 (10) |
| Fe1—C10—H10        | 126.0              | C8—Fe1—C2  | 104.75 (10) |
| C12—C11—C5         | 123.41 (18)        | C8—Fe1—C4  | 145.42 (9)  |
| C20—C11—C5         | 118.07 (18)        | C8—Fe1—C5  | 169.60 (10) |
| C20—C11—C12        | 118.43 (18)        | C8—Fe1—C6  | 67.98 (10)  |
| C11—C12—C13        | 126.66 (19)        | C8—Fe1—C7  | 40.49 (9)   |
| C18—C12—C11        | 115.67 (18)        | C8—Fe1—C10 | 68.21 (11)  |
| C18—C12—C13        | 117.63 (18)        | C9—Fe1—C1  | 166.44 (12) |
| <b>C12—C13—C14</b> | <b>124.39 (19)</b> | C9—Fe1—C2  | 126.71 (11) |
| C15—C13—C12        | 119.1 (2)          | C9—Fe1—C4  | 114.70 (9)  |
| <b>C15—C13—C14</b> | <b>116.55 (19)</b> | C9—Fe1—C5  | 149.55 (10) |
| C13—C14—H14A       | 109.5              | C9—Fe1—C6  | 67.86 (11)  |
| C13—C14—H14B       | 109.5              | C9—Fe1—C7  | 68.10 (10)  |
| C13—C14—H14C       | 109.5              | C9—Fe1—C8  | 40.82 (11)  |
| H14A—C14—H14B      | 109.5              | C9—Fe1—C10 | 40.32 (12)  |
| H14A—C14—H14C      | 109.5              | C10—Fe1—C1 | 152.79 (11) |
| H14B—C14—H14C      | 109.5              | C10—Fe1—C5 | 120.33 (10) |
| C13—C15—H15        | 118.6              | C10—Fe1—C6 | 40.37 (10)  |

|               |              |               |              |
|---------------|--------------|---------------|--------------|
| C13—C15—C16   | 122.7 (2)    | C10—Fe1—C7    | 67.89 (10)   |
| C16—C15—H15   | 118.6        | C19—N1—C18    | 118.32 (18)  |
| C15—C16—H16   | 120.2        |               |              |
| C1—C2—C3—C4   | -0.5 (2)     | C7—C6—Fe1—C8  | -37.60 (14)  |
| C1—C2—C3—Fe1  | 59.58 (14)   | C7—C6—Fe1—C9  | -81.81 (16)  |
| C1—C2—Fe1—C3  | -119.44 (18) | C7—C6—Fe1—C10 | -119.4 (2)   |
| C1—C2—Fe1—C4  | -81.31 (13)  | C7—C8—C9—C10  | -0.4 (3)     |
| C1—C2—Fe1—C5  | -37.49 (12)  | C7—C8—C9—Fe1  | -60.45 (16)  |
| C1—C2—Fe1—C6  | 63.0 (2)     | C7—C8—Fe1—C1  | -74.62 (18)  |
| C1—C2—Fe1—C7  | 92.64 (13)   | C7—C8—Fe1—C2  | -111.61 (15) |
| C1—C2—Fe1—C8  | 134.46 (13)  | C7—C8—Fe1—C3  | -154.18 (14) |
| C1—C2—Fe1—C9  | 173.20 (13)  | C7—C8—Fe1—C4  | 174.95 (15)  |
| C1—C2—Fe1—C10 | -167.8 (4)   | C7—C8—Fe1—C5  | -65.5 (5)    |
| C1—C5—C11—C12 | -78.2 (3)    | C7—C8—Fe1—C6  | 37.36 (14)   |
| C1—C5—C11—C20 | 105.2 (2)    | C7—C8—Fe1—C9  | 118.5 (2)    |
| C1—C5—Fe1—C2  | 37.74 (12)   | C7—C8—Fe1—C10 | 81.02 (16)   |
| C1—C5—Fe1—C3  | 81.89 (13)   | C8—C7—Fe1—C1  | 127.30 (16)  |
| C1—C5—Fe1—C4  | 119.75 (17)  | C8—C7—Fe1—C2  | 83.30 (17)   |
| C1—C5—Fe1—C6  | -109.41 (14) | C8—C7—Fe1—C3  | 45.5 (2)     |
| C1—C5—Fe1—C7  | -66.66 (16)  | C8—C7—Fe1—C4  | -154.5 (7)   |
| C1—C5—Fe1—C8  | -10.9 (5)    | C8—C7—Fe1—C5  | 166.71 (15)  |
| C1—C5—Fe1—C9  | 163.9 (2)    | C8—C7—Fe1—C6  | -119.4 (2)   |
| C1—C5—Fe1—C10 | -154.50 (14) | C8—C7—Fe1—C9  | -38.24 (17)  |
| C2—C1—C5—C4   | -1.4 (2)     | C8—C7—Fe1—C10 | -81.89 (17)  |
| C2—C1—C5—C11  | 173.80 (19)  | C8—C9—C10—C6  | 0.2 (3)      |
| C2—C1—C5—Fe1  | -59.14 (14)  | C8—C9—C10—Fe1 | -59.63 (17)  |
| C2—C1—Fe1—C3  | 37.74 (13)   | C8—C9—Fe1—C1  | -48.6 (4)    |
| C2—C1—Fe1—C4  | 81.84 (13)   | C8—C9—Fe1—C2  | -67.81 (18)  |
| C2—C1—Fe1—C5  | 119.28 (18)  | C8—C9—Fe1—C3  | -106.42 (16) |
| C2—C1—Fe1—C6  | -148.61 (13) | C8—C9—Fe1—C4  | -148.63 (14) |
| C2—C1—Fe1—C7  | -105.16 (13) | C8—C9—Fe1—C5  | -178.56 (17) |
| C2—C1—Fe1—C8  | -63.24 (16)  | C8—C9—Fe1—C6  | 81.48 (16)   |
| C2—C1—Fe1—C9  | -23.9 (4)    | C8—C9—Fe1—C7  | 37.94 (15)   |
| C2—C1—Fe1—C10 | 173.65 (19)  | C8—C9—Fe1—C10 | 119.1 (2)    |
| C2—C3—C4—C5   | -0.4 (2)     | C9—C8—Fe1—C1  | 166.85 (16)  |
| C2—C3—C4—Fe1  | 60.02 (14)   | C9—C8—Fe1—C2  | 129.87 (17)  |
| C2—C3—Fe1—C1  | -37.53 (12)  | C9—C8—Fe1—C3  | 87.30 (18)   |
| C2—C3—Fe1—C4  | -118.64 (17) | C9—C8—Fe1—C4  | 56.4 (2)     |
| C2—C3—Fe1—C5  | -81.04 (13)  | C9—C8—Fe1—C5  | 175.9 (5)    |
| C2—C3—Fe1—C6  | 173.3 (4)    | C9—C8—Fe1—C6  | -81.17 (18)  |
| C2—C3—Fe1—C7  | 57.9 (2)     | C9—C8—Fe1—C7  | -118.5 (2)   |
| C2—C3—Fe1—C8  | 87.78 (14)   | C9—C8—Fe1—C10 | -37.51 (17)  |

|               |              |                 |              |
|---------------|--------------|-----------------|--------------|
| C2—C3—Fe1—C9  | 130.18 (14)  | C9—C10—Fe1—C1   | 173.74 (17)  |
| C2—C3—Fe1—C10 | 166.64 (14)  | C9—C10—Fe1—C2   | -23.7 (5)    |
| C3—C2—Fe1—C1  | 119.44 (17)  | C9—C10—Fe1—C3   | -62.78 (18)  |
| C3—C2—Fe1—C4  | 38.13 (12)   | C9—C10—Fe1—C4   | -105.00 (15) |
| C3—C2—Fe1—C5  | 81.95 (13)   | C9—C10—Fe1—C5   | -148.67 (14) |
| C3—C2—Fe1—C6  | -177.55 (16) | C9—C10—Fe1—C6   | 119.1 (2)    |
| C3—C2—Fe1—C7  | -147.92 (12) | C9—C10—Fe1—C7   | 81.75 (16)   |
| C3—C2—Fe1—C8  | -106.10 (14) | C9—C10—Fe1—C8   | 37.95 (15)   |
| C3—C2—Fe1—C9  | -67.36 (16)  | C10—C6—C7—C8    | -0.3 (2)     |
| C3—C2—Fe1—C10 | -48.4 (4)    | C10—C6—C7—Fe1   | -59.06 (15)  |
| C3—C4—C5—C1   | 1.1 (2)      | C10—C6—Fe1—C1   | -154.40 (15) |
| C3—C4—C5—C11  | -174.22 (18) | C10—C6—Fe1—C2   | 163.29 (18)  |
| C3—C4—C5—Fe1  | 59.16 (14)   | C10—C6—Fe1—C3   | -8.0 (5)     |
| C3—C4—Fe1—C1  | -82.00 (13)  | C10—C6—Fe1—C4   | -65.92 (19)  |
| C3—C4—Fe1—C2  | -38.13 (12)  | C10—C6—Fe1—C5   | -109.29 (16) |
| C3—C4—Fe1—C5  | -119.25 (17) | C10—C6—Fe1—C7   | 119.4 (2)    |
| C3—C4—Fe1—C6  | 166.08 (14)  | C10—C6—Fe1—C8   | 81.81 (17)   |
| C3—C4—Fe1—C7  | -162.8 (7)   | C10—C6—Fe1—C9   | 37.60 (16)   |
| C3—C4—Fe1—C8  | 46.8 (2)     | C10—C9—Fe1—C1   | -167.7 (3)   |
| C3—C4—Fe1—C9  | 83.62 (16)   | C10—C9—Fe1—C2   | 173.08 (14)  |
| C3—C4—Fe1—C10 | 127.09 (15)  | C10—C9—Fe1—C3   | 134.47 (15)  |
| C4—C3—Fe1—C1  | 81.11 (13)   | C10—C9—Fe1—C4   | 92.25 (16)   |
| C4—C3—Fe1—C2  | 118.64 (17)  | C10—C9—Fe1—C5   | 62.3 (2)     |
| C4—C3—Fe1—C5  | 37.59 (12)   | C10—C9—Fe1—C6   | -37.64 (15)  |
| C4—C3—Fe1—C6  | -68.0 (5)    | C10—C9—Fe1—C7   | -81.18 (15)  |
| C4—C3—Fe1—C7  | 176.53 (14)  | C10—C9—Fe1—C8   | -119.1 (2)   |
| C4—C3—Fe1—C8  | -153.58 (13) | C11—C5—Fe1—C1   | 121.5 (2)    |
| C4—C3—Fe1—C9  | -111.19 (14) | C11—C5—Fe1—C2   | 159.3 (2)    |
| C4—C3—Fe1—C10 | -74.72 (17)  | C11—C5—Fe1—C3   | -156.6 (2)   |
| C4—C5—C11—C12 | 96.2 (2)     | C11—C5—Fe1—C4   | -118.7 (2)   |
| C4—C5—C11—C20 | -80.3 (3)    | C11—C5—Fe1—C6   | 12.1 (2)     |
| C4—C5—Fe1—C1  | -119.75 (17) | C11—C5—Fe1—C7   | 54.9 (2)     |
| C4—C5—Fe1—C2  | -82.01 (13)  | C11—C5—Fe1—C8   | 110.7 (5)    |
| C4—C5—Fe1—C3  | -37.86 (12)  | C11—C5—Fe1—C9   | -74.6 (3)    |
| C4—C5—Fe1—C6  | 130.84 (13)  | C11—C5—Fe1—C10  | -33.0 (2)    |
| C4—C5—Fe1—C7  | 173.59 (13)  | C11—C12—C13—C14 | 1.5 (3)      |
| C4—C5—Fe1—C8  | -130.6 (5)   | C11—C12—C13—C15 | -178.4 (2)   |
| C4—C5—Fe1—C9  | 44.1 (3)     | C11—C12—C18—C17 | 178.69 (18)  |
| C4—C5—Fe1—C10 | 85.75 (15)   | C11—C12—C18—N1  | -0.3 (3)     |
| C5—C1—C2—C3   | 1.2 (2)      | C12—C11—C20—C19 | 0.7 (3)      |
| C5—C1—C2—Fe1  | 60.13 (14)   | C12—C13—C15—C16 | 0.5 (3)      |
| C5—C1—Fe1—C2  | -119.28 (18) | C12—C18—N1—C19  | 0.5 (3)      |
| C5—C1—Fe1—C3  | -81.54 (13)  | C13—C12—C18—C17 | 0.8 (3)      |

|                |              |                 |              |
|----------------|--------------|-----------------|--------------|
| C5—C1—Fe1—C4   | -37.44 (12)  | C13—C12—C18—N1  | -178.17 (19) |
| C5—C1—Fe1—C6   | 92.11 (14)   | C13—C15—C16—C17 | -0.2 (4)     |
| C5—C1—Fe1—C7   | 135.55 (12)  | C14—C13—C15—C16 | -179.4 (2)   |
| C5—C1—Fe1—C8   | 177.48 (13)  | C15—C16—C17—C18 | 0.2 (3)      |
| C5—C1—Fe1—C9   | -143.2 (4)   | C16—C17—C18—C12 | -0.5 (3)     |
| C5—C1—Fe1—C10  | 54.4 (2)     | C16—C17—C18—N1  | 178.6 (2)    |
| C5—C4—Fe1—C1   | 37.25 (12)   | C17—C18—N1—C19  | -178.56 (18) |
| C5—C4—Fe1—C2   | 81.12 (13)   | C18—C12—C13—C14 | 179.1 (2)    |
| C5—C4—Fe1—C3   | 119.25 (17)  | C18—C12—C13—C15 | -0.8 (3)     |
| C5—C4—Fe1—C6   | -74.67 (16)  | C19—C21—C22—C23 | -174.44 (19) |
| C5—C4—Fe1—C7   | -43.5 (8)    | C19—C21—C26—C25 | 174.19 (18)  |
| C5—C4—Fe1—C8   | 166.03 (17)  | C20—C11—C12—C13 | 177.36 (19)  |
| C5—C4—Fe1—C9   | -157.13 (15) | C20—C11—C12—C18 | -0.3 (3)     |
| C5—C4—Fe1—C10  | -113.66 (14) | C20—C19—C21—C22 | 152.1 (2)    |
| C5—C11—C12—C13 | 0.8 (3)      | C20—C19—C21—C26 | -23.4 (3)    |
| C5—C11—C12—C18 | -176.85 (18) | C20—C19—N1—C18  | -0.1 (3)     |
| C5—C11—C20—C19 | 177.45 (18)  | C21—C19—C20—C11 | -176.83 (18) |
| C6—C7—C8—C9    | 0.4 (3)      | C21—C19—N1—C18  | 176.34 (17)  |
| C6—C7—C8—Fe1   | -59.34 (15)  | C21—C22—C23—C24 | 0.1 (3)      |
| C6—C7—Fe1—C1   | -113.30 (14) | C22—C21—C26—C25 | -1.4 (3)     |
| C6—C7—Fe1—C2   | -157.29 (14) | C22—C23—C24—C25 | -1.4 (3)     |
| C6—C7—Fe1—C3   | 164.93 (15)  | C23—C24—C25—C26 | 1.2 (3)      |
| C6—C7—Fe1—C4   | -35.1 (8)    | C24—C25—C26—C21 | 0.2 (3)      |
| C6—C7—Fe1—C5   | -73.89 (18)  | C26—C21—C22—C23 | 1.3 (3)      |
| C6—C7—Fe1—C8   | 119.4 (2)    | Fe1—C1—C2—C3    | -58.92 (14)  |
| C6—C7—Fe1—C9   | 81.17 (17)   | Fe1—C1—C5—C4    | 57.70 (13)   |
| C6—C7—Fe1—C10  | 37.52 (15)   | Fe1—C1—C5—C11   | -127.1 (2)   |
| C6—C10—Fe1—C1  | 54.6 (3)     | Fe1—C2—C3—C4    | -60.09 (14)  |
| C6—C10—Fe1—C2  | -142.9 (4)   | Fe1—C3—C4—C5    | -60.41 (14)  |
| C6—C10—Fe1—C3  | 178.08 (13)  | Fe1—C4—C5—C1    | -58.03 (14)  |
| C6—C10—Fe1—C4  | 135.86 (14)  | Fe1—C4—C5—C11   | 126.6 (2)    |
| C6—C10—Fe1—C5  | 92.19 (15)   | Fe1—C5—C11—C12  | -172.22 (15) |
| C6—C10—Fe1—C7  | -37.39 (13)  | Fe1—C5—C11—C20  | 11.2 (3)     |
| C6—C10—Fe1—C8  | -81.19 (15)  | Fe1—C6—C7—C8    | 58.71 (15)   |
| C6—C10—Fe1—C9  | -119.1 (2)   | Fe1—C6—C10—C9   | -59.20 (17)  |
| C7—C6—C10—C9   | 0.1 (3)      | Fe1—C7—C8—C9    | 59.78 (16)   |
| C7—C6—C10—Fe1  | 59.31 (15)   | Fe1—C8—C9—C10   | 60.07 (17)   |
| C7—C6—Fe1—C1   | 86.19 (15)   | Fe1—C9—C10—C6   | 59.80 (16)   |
| C7—C6—Fe1—C2   | 43.9 (2)     | N1—C19—C20—C11  | -0.6 (3)     |
| C7—C6—Fe1—C3   | -127.5 (4)   | N1—C19—C21—C22  | -24.3 (3)    |
| C7—C6—Fe1—C4   | 174.68 (13)  | N1—C19—C21—C26  | 160.14 (19)  |
| C7—C6—Fe1—C5   | 131.30 (13)  |                 |              |

**Table S5** Hydrogen bond geometry ( $\text{\AA}$ ,  $^\circ$ ) for **4a** and **4k**

| Compd.    | D–H $\cdots$ A                      | d(D–H) | d(H $\cdots$ A) | d(D $\cdots$ A) | $\angle$ (D–H $\cdots$ A) |
|-----------|-------------------------------------|--------|-----------------|-----------------|---------------------------|
| <b>4a</b> | C1–H1 $\cdots$ Cg1 <sup>i</sup>     | 0.98   | 2.593           | 3.498(1)        | 153.6                     |
|           | C17–H17 $\cdots$ Cg2 <sup>ii</sup>  | 0.93   | 2.925           | 3.792(3)        | 155.7                     |
|           | C4–H4 $\cdots$ Cg3 <sup>iii</sup>   | 0.98   | 2.612           | 3.567(1)        | 164.9                     |
|           | C10–H10 $\cdots$ Cg4 <sup>iii</sup> | 0.98   | 2.812           | 3.752(2)        | 160.9                     |
| <b>4k</b> | C1–H1 $\cdots$ Cg1 <sup>i</sup>     | 0.98   | 2.881           | 3.724(2)        | 144.7                     |
|           | C23–H23 $\cdots$ Cg2 <sup>i</sup>   | 0.93   | 3.039           | 3.745(1)        | 134.0                     |
|           | C9–H9 $\cdots$ Cg3 <sup>ii</sup>    | 0.98   | 2.847           | 3.780(2)        | 159.3                     |
|           | C16–H16 $\cdots$ Cg4 <sup>iii</sup> | 0.93   | 3.226           | 3.885(3)        | 129.5                     |

Symmetry codes: **4a**: (i)  $3/2 - x, 1/2 + y, 1/2 - z$ ; (ii)  $-1/2 + x, 1/2 - y, 1/2 + z$ ; (iii)  $3/2 - x, -1/2 + y, 1/2 - z$ . Cg1 is the centroid of C13–C14 bond; Cg2, Cg3 and Cg4 are the centroid of C6–C10, C20–C25 and pyridine rings, respectively. **4k**: (i)  $-x, 1 - y, 2 - z$ ; (ii)  $-x, 1 - y, 1 - z$ ; (iii)  $1 + x, y, 1 + z$ . Cg1 and Cg2 are the centroid of C18–N1–C19 and C2–C3–C4 bonds, Cg3 and Cg4 are the centroid of C21–C26 and C6–C10 rings, respectively.

### 3. Hirshfeld surface analysis of **4a** and **4k**

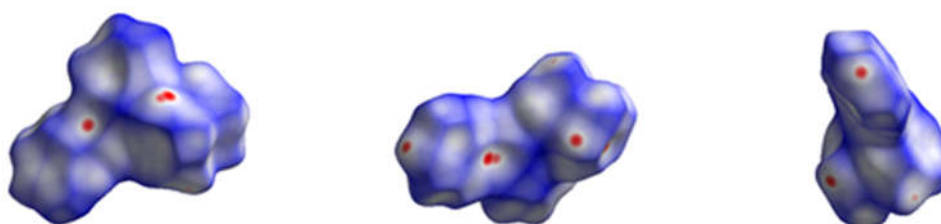**Fig. S1** Hirshfeld surfaces for **4a** are shown in different orientations.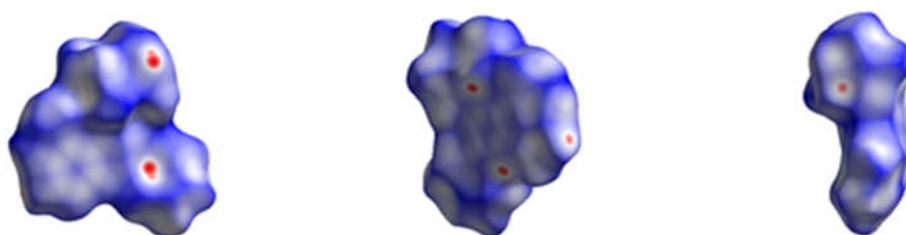**Fig. S2** Hirshfeld surfaces for **4k** are shown in different orientations.

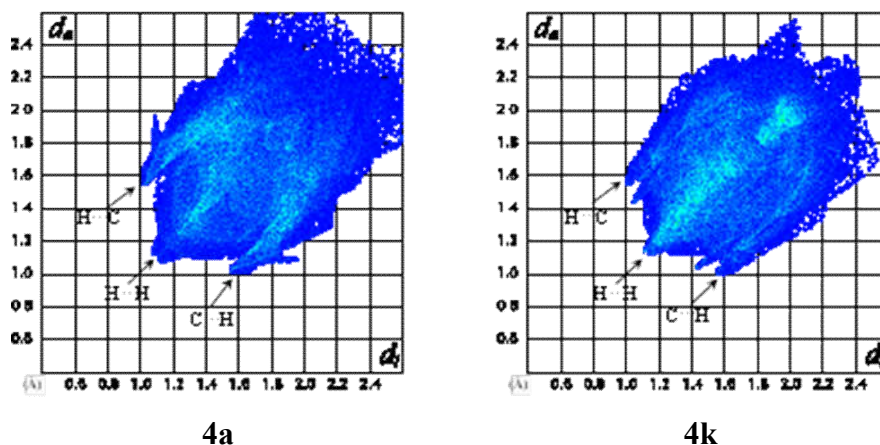

4a 4k  
 Fig. S3 Fingerprint plots of 4a and 4k.

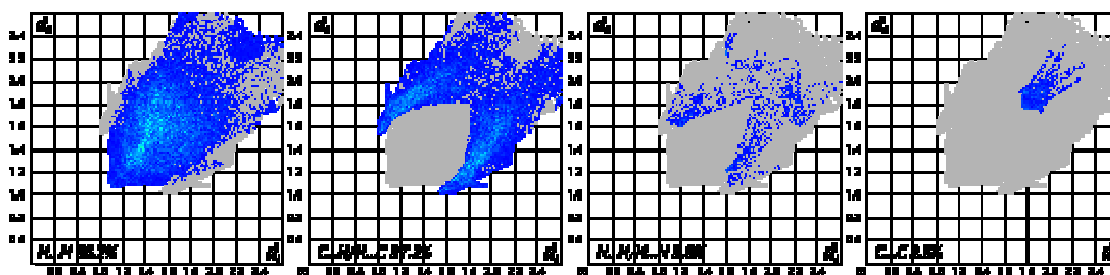

Fig. S4 Fingerprint plots of 4a resolved into the indicated intermolecular contacts.

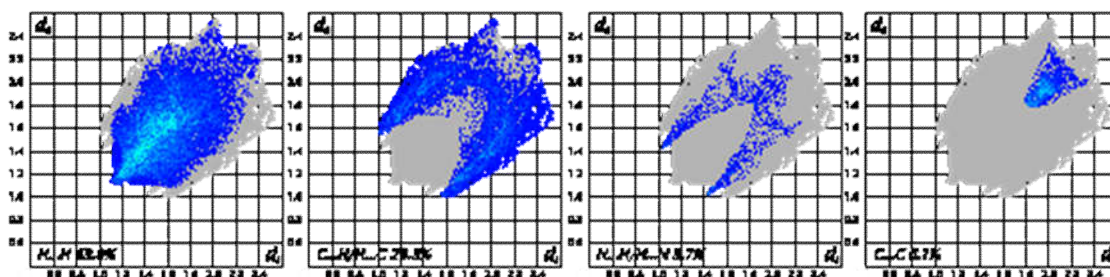

Fig. S5 Fingerprint plots of 4k resolved into the indicated intermolecular contacts.

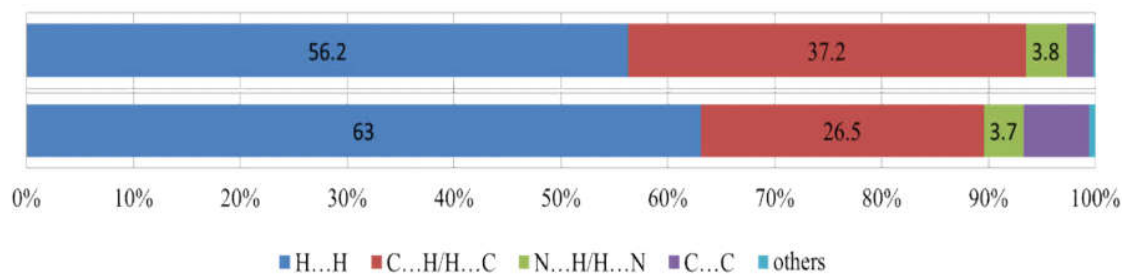

Fig. S6 Distribution of intermolecular contacts from Hirshfeld surface analysis (%) for 4a (top) and 4k (bottom).



## 4. Electrochemistry of **4**

Cyclic voltammetry measurements were performed using a solution of compounds **4** ( $7.0 \times 10^{-4}$  M) in CH<sub>3</sub>CN with 0.1 M *n*-Bu<sub>4</sub>NPF<sub>6</sub> as supporting electrolyte, Hg/Hg<sub>2</sub>Cl<sub>2</sub> as the reference electrode, along with platinum working and auxiliary electrodes, and a scan rate of 100 mVs<sup>-1</sup>. Fig S7 showed the CV curves of **4**.

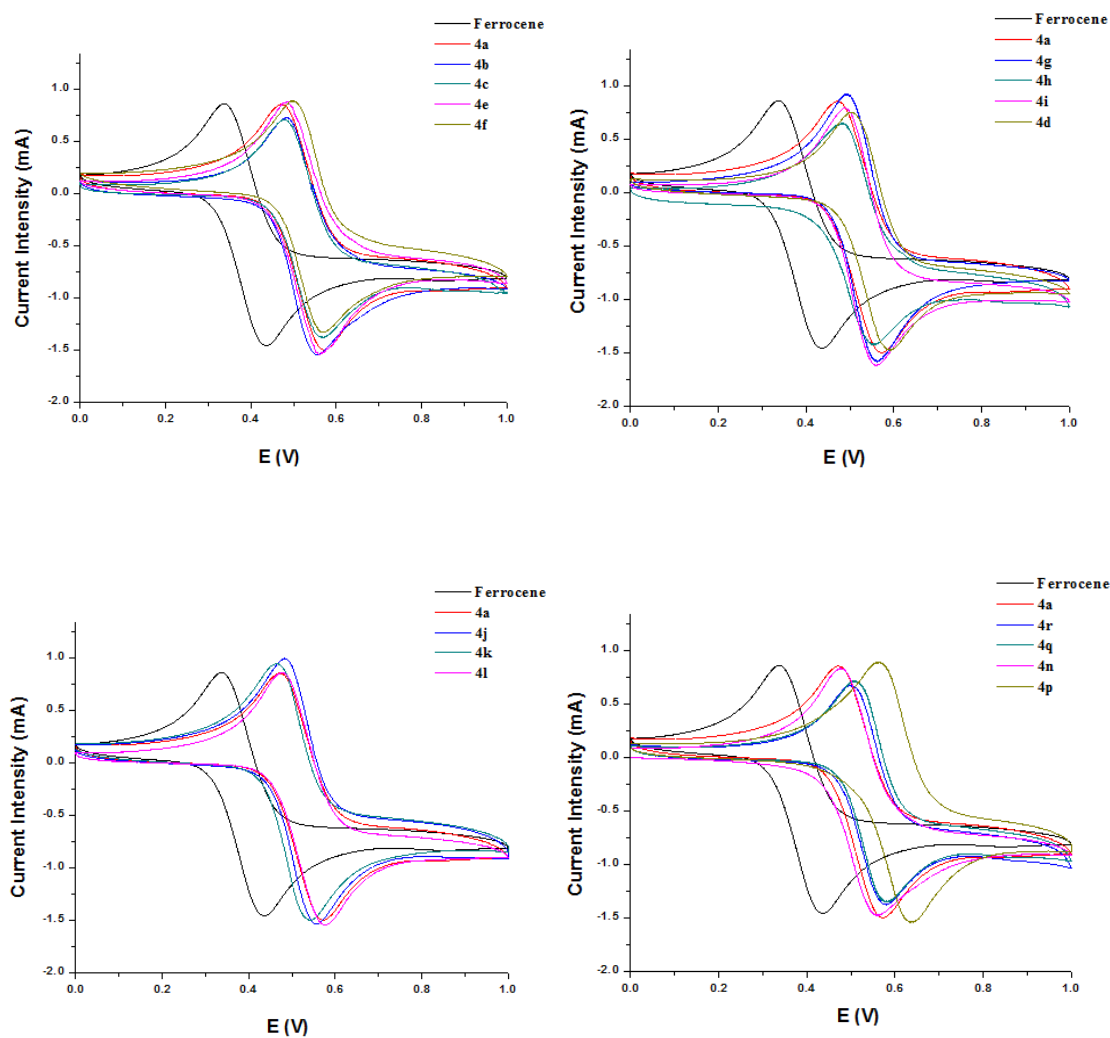

**Fig. S7** CV curves of compounds **4**.

## 5. UV-vis properties of **4**

UV-vis spectra were carried out using two different concentrations of **4** ( $3.0 \times 10^{-5}$  M and  $7.0 \times 10^{-4}$  M) in anhydrous MeOH. The results are summarized in Table S6 and shown Fig. S8.

**Table S6** UV-vis spectral data for **4a-4t**

| Compd.    | $\lambda_1/\text{nm}$ | $A_1^a$ | $\lambda_2/\text{nm}$ | $A_2^a$ | $\lambda_3/\text{nm}$ | $A_3^a$ | $\lambda_4/\text{nm}$ | $A_4^b$ | $\lambda_5/\text{nm}$ | $A_5^b$ |
|-----------|-----------------------|---------|-----------------------|---------|-----------------------|---------|-----------------------|---------|-----------------------|---------|
| <b>4a</b> | 211                   | 3.287   | 257                   | 2.423   | 314                   | 0.811   | 386                   | 1.099   | 466                   | 0.792   |
| <b>4b</b> | 204                   | 2.919   | 264                   | 1.717   | 314                   | 0.720   | 382                   | 1.237   | 465                   | 0.714   |
| <b>4c</b> | 203                   | 2.598   | 275                   | 1.328   | 320                   | 0.703   | 393                   | 1.203   | 465                   | 0.653   |
| <b>4d</b> | 202                   | 2.422   | 263                   | 1.736   | 313                   | 0.724   |                       |         | 468                   | 0.847   |
| <b>4e</b> | 203                   | 2.496   | 276                   | 1.219   | 286                   | 1.200   | 385                   | 1.101   | 469                   | 0.686   |
| <b>4f</b> | 203                   | 2.821   | 300                   | 1.402   | 330                   | 1.156   |                       |         | 483                   | 0.812   |
| <b>4g</b> | 203                   | 2.692   | 256                   | 2.176   | 317                   | 0.672   | 394                   | 0.986   | 475                   | 0.852   |
| <b>4h</b> | 203                   | 2.152   | 275                   | 1.121   | 324                   | 0.625   | 393                   | 1.232   | 469                   | 0.798   |
| <b>4i</b> | 204                   | 2.478   | 276                   | 1.208   | 325                   | 0.729   | 393                   | 1.203   | 468                   | 0.798   |
| <b>4j</b> | 203                   | 2.700   | 263                   | 1.958   | 314                   | 0.527   | 385                   | 1.015   | 466                   | 0.571   |
| <b>4k</b> | 204                   | 2.848   | 259                   | 2.114   | 316                   | 0.617   | 383                   | 1.174   | 464                   | 0.689   |
| <b>4l</b> | 204                   | 2.932   | 260                   | 2.207   | 316                   | 0.651   | 383.5                 | 1.089   | 464                   | 0.656   |
| <b>4m</b> | 205                   | 2.770   | 263                   | 1.939   | 315                   | 0.416   | 382                   | 0.951   | 460                   | 0.385   |
| <b>4n</b> | 203                   | 2.386   | 274                   | 1.809   | 328                   | 0.272   | 329                   | 3.677   | 468                   | 0.723   |
| <b>4o</b> | 204                   | 2.489   | 258                   | 1.737   | 310                   | 0.395   | 395                   | 1.100   | 465                   | 0.681   |
| <b>4p</b> | 204                   | 2.391   | 262                   | 1.326   | 323                   | 0.506   | 404                   | 1.111   | 486                   | 0.888   |
| <b>4q</b> | 204                   | 2.520   | 265                   | 1.696   | 320                   | 0.506   | 392                   | 0.810   | 476                   | 0.662   |
| <b>4r</b> | 204                   | 2.489   | 266                   | 1.761   | 321                   | 0.526   | 393                   | 0.884   | 477                   | 0.722   |
| <b>4s</b> | 203                   | 1.998   | 263                   | 1.553   | 318                   | 0.525   | 394                   | 0.731   | 469                   | 0.621   |
| <b>4t</b> | 205                   | 3.154   | 287                   | 1.033   | 310                   | 0.820   | 381                   | 2.862   | 459                   | 1.598   |

<sup>a</sup> Data obtained in  $3.0 \times 10^{-5}$  M of **4** in anhydrous MeOH;

<sup>b</sup> Data obtained in  $7.0 \times 10^{-4}$  M of **4** in anhydrous MeOH.

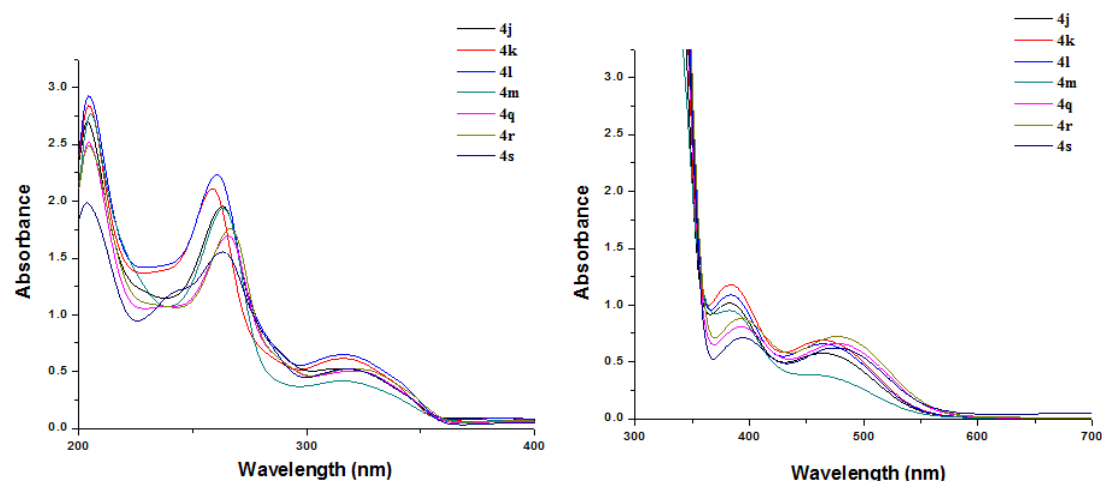

**Fig. S8** UV-vis spectra of **4j**, **4k**, **4l**, **4m**, **4q**, **4r** and **4s** ( $3.0 \times 10^{-5}$  M, left) and ( $7.0 \times 10^{-4}$  M, right) in anhydrous MeOH.

## 6. Supplementary experiments for the mechanism

### 6.1 Synthesis of **4a** using aldimine **1a** instead of **2a** and **3a**

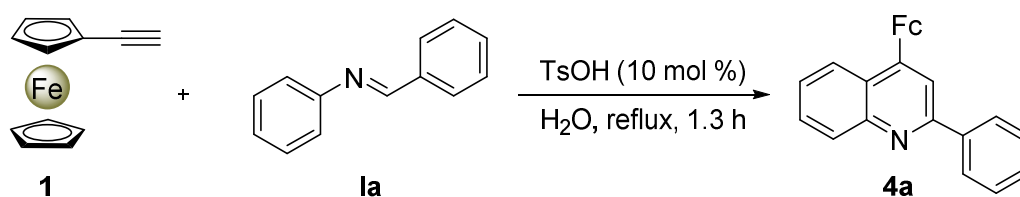

Synthetic procedure:

A suspension of ferrocenylacetylene **1** (0.210 g, 1.0 mmol), aldimine **1a** (0.182 g, 1.0 mmol), and TsOH (0.017 g, 0.1 mmol) in water (1.0 mL) was stirred at 100 °C for 1.3 h. The reaction mixture was cooled to room temperature and then extracted with ethyl acetate. The organic phase was washed with saturated sodium bicarbonate solution and brine, and dried over anhydrous  $\text{MgSO}_4$ . After removal of the solvent, the residue was purified by flash column chromatography on silica gel (ethyl acetate/hexane = 1:20, v/v,  $R_f = 0.3$ ), to give **4a** in 91% yield (while no **4a** was formed in the absence of TsOH).

### 6.2 Synthesis of **6** using aldimine **5** and ferrocenylacetylene **1**

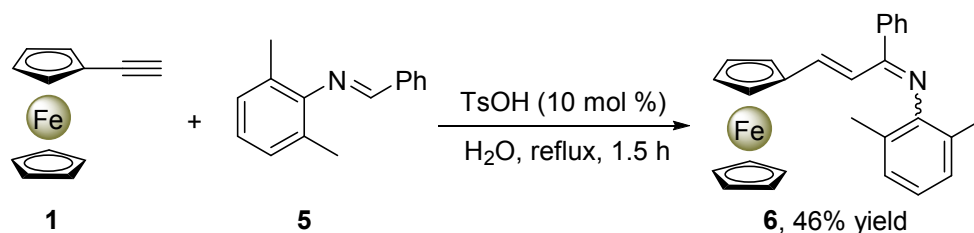

### Synthetic procedure:

A suspension of aldimine **5** (0.210 g, 1.0 mmol), ferrocenylacetylene **1** (0.210 g, 1.0 mmol) and TsOH (0.017 g, 0.1 mmol) in H<sub>2</sub>O (1.0 mL) was stirred at 100 °C for 1.5 h. The reaction mixture was cooled to room temperature and then extracted with ethyl acetate. The organic phase was washed with saturated sodium bicarbonate solution and brine, and dried over anhydrous MgSO<sub>4</sub>. After removal of the solvent, the residue was purified by flash column chromatography on silica gel (ethyl acetate/hexane = 1:20, v/v, *R<sub>f</sub>* = 0.6), to give **6** in 46% as a red solid, m.p. 103-106 °C.

### Characterization:

<sup>1</sup>H NMR (CDCl<sub>3</sub>, 400 MHz): δ 7.82 (d, *J* = 15.5 Hz, 0.6H), 7.65 (d, *J* = 7.5 Hz, 1.2H), 7.45-7.41 (m, 2.4H), 7.37 (d, *J* = 7.2 Hz, 0.6H), 7.34-7.26 (m, 6H), 7.03-6.98 (m, 3H), 6.90 (t, *J* = 7.8 Hz, 1.8H), 6.51 (d, *J* = 16.6 Hz, 1H), 4.91 (s, 2H), 4.49 (s, 2H), 4.30 (s, 5H), 4.24 (s, 1.2H), 4.20 (s, 3H), 4.08 (s, 1.2H), 2.09 (s, 6H), 2.02 (s, 3.6H); <sup>13</sup>C NMR (CDCl<sub>3</sub>, 100 MHz): δ 149.1, 137.9, 136.5, 136.1, 134.9, 129.1, 128.9, 128.8, 127.9, 127.5, 127.2, 126.78, 125.7, 122.7, 122.4, 121.8, 82.7, 70.5, 70.3, 69.7, 69.6, 69.4, 18.3, 18.0. HR-MS (ESI): Calcd for C<sub>27</sub>H<sub>25</sub>FeN [M+H]<sup>+</sup>: 420.1415; Found: 420.1404.

Note: Aldimine **1** and **5** were prepared by the literature methods<sup>[1,2]</sup>.

### Reference:

- [1] N. S. Khrushcheva, N. M. Loim and V. L. Sokoiov, *Russ. Chem. Bull.*, 1997, **46**, 1952-1953;
- [2] I. Iovel, L. Golomba, M. Fleisher, J. Popelis, S. Grinberga and E. Lukevics, *Chem. Heterocycl. Compd.*, 2004, **40**, 701-714.

## 7 NMR spectra of **4a-4t** and **6** (where Fc refers to the ferrocenyl group).

The  $^1\text{H}$  NMR of **4a**.

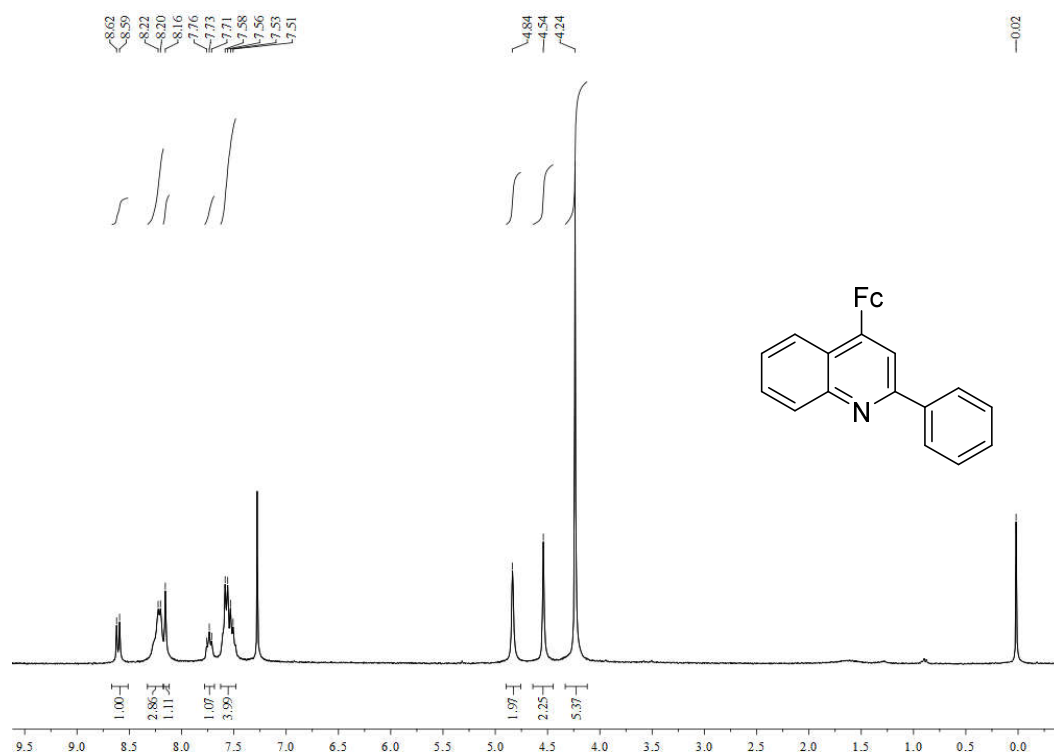

The  $^{13}\text{C}$  NMR of **4a**.

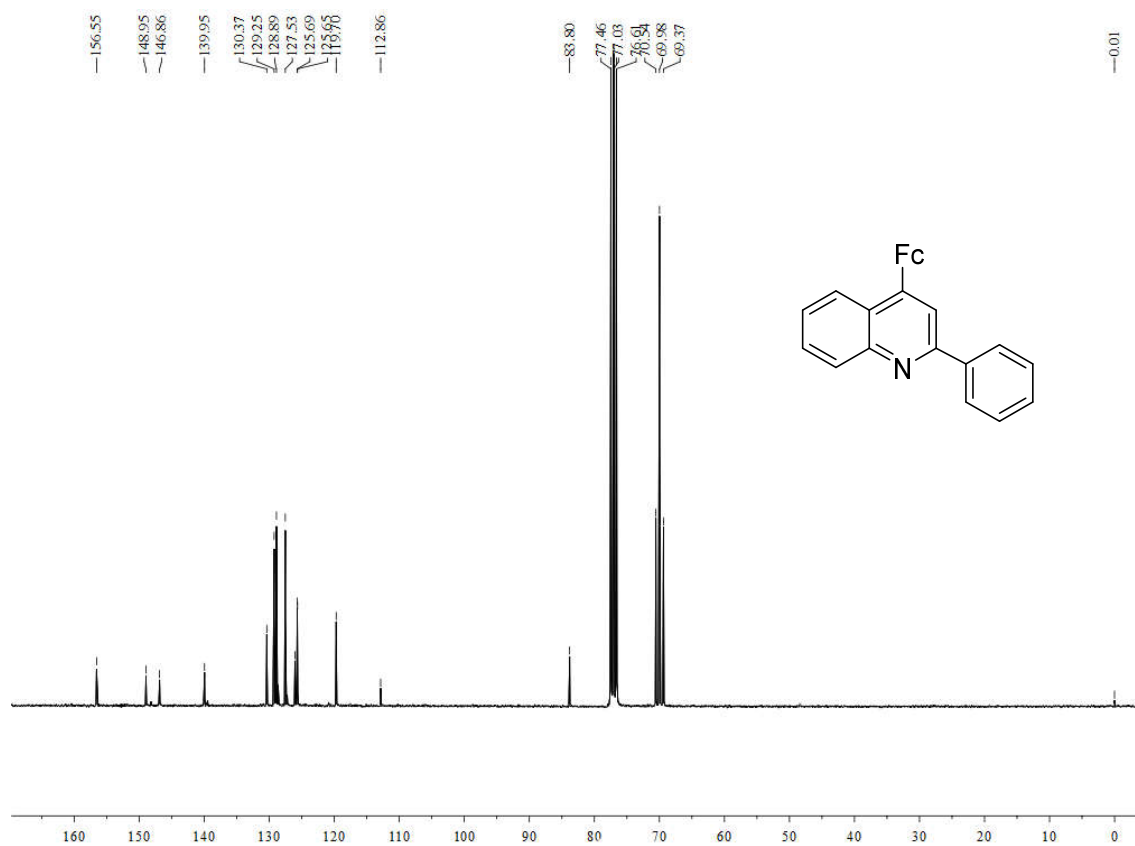

The  $^1\text{H}$  NMR of **4b**.

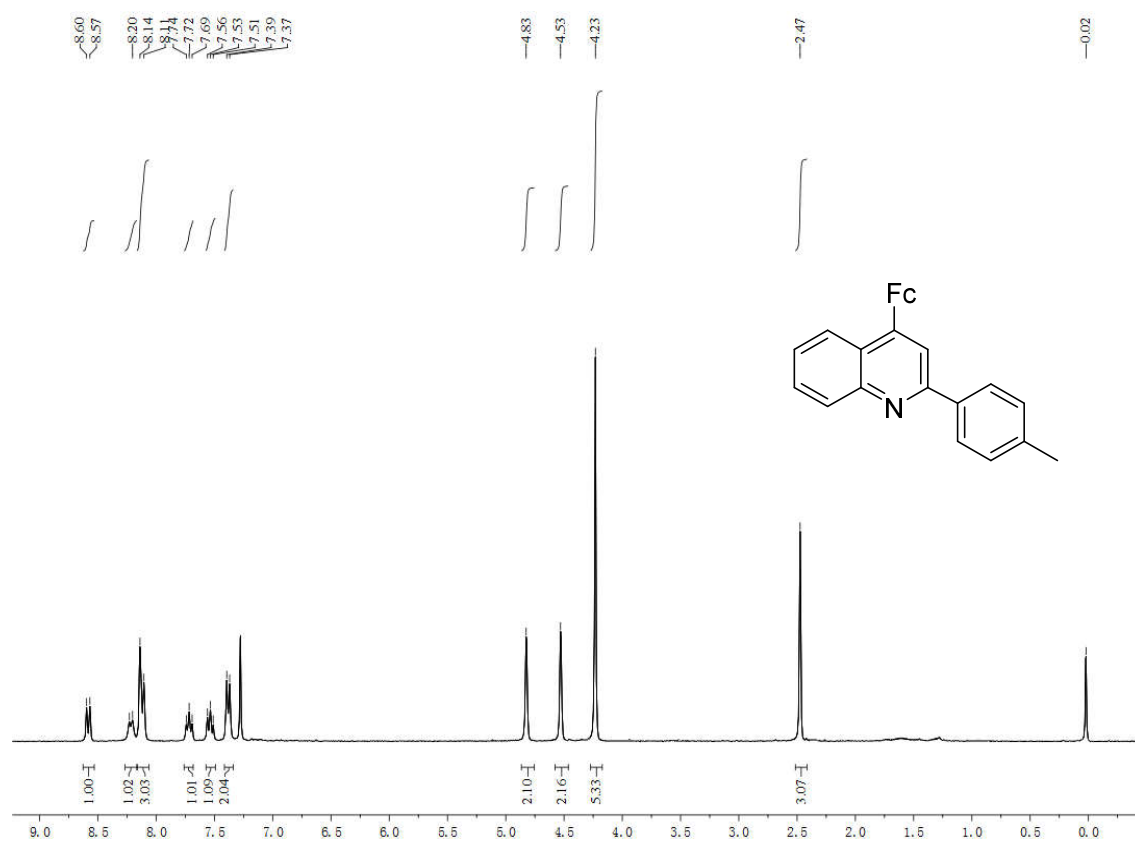

The  $^{13}\text{C}$  NMR of **4b**.

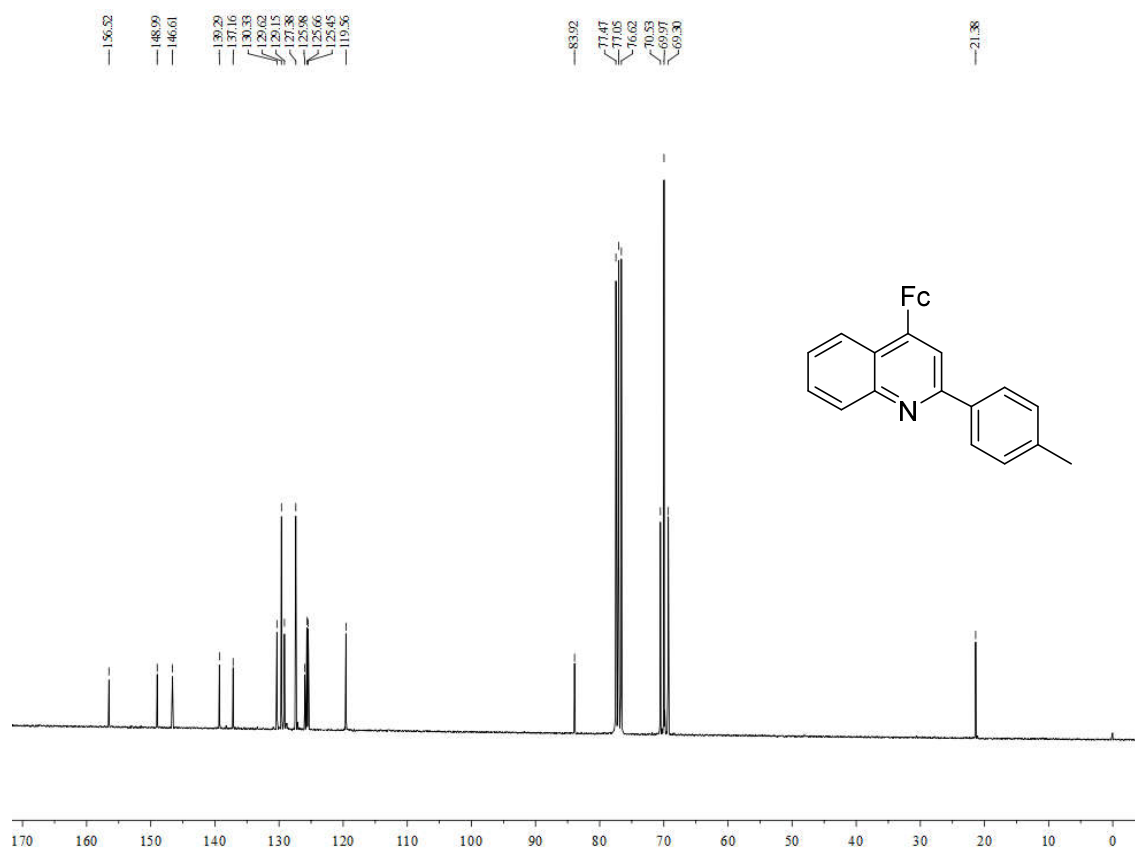

### The $^1\text{H}$ NMR of **4c**.

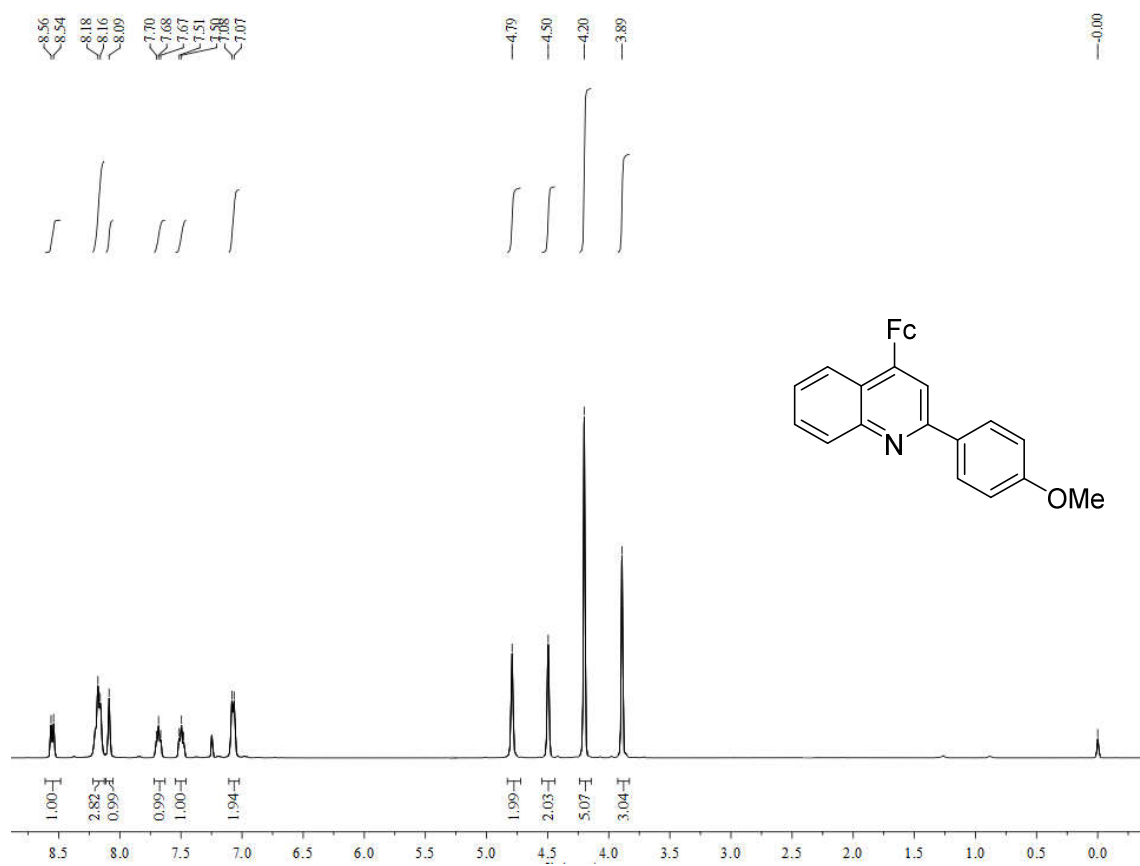

### The $^{13}\text{C}$ NMR of **4c**.

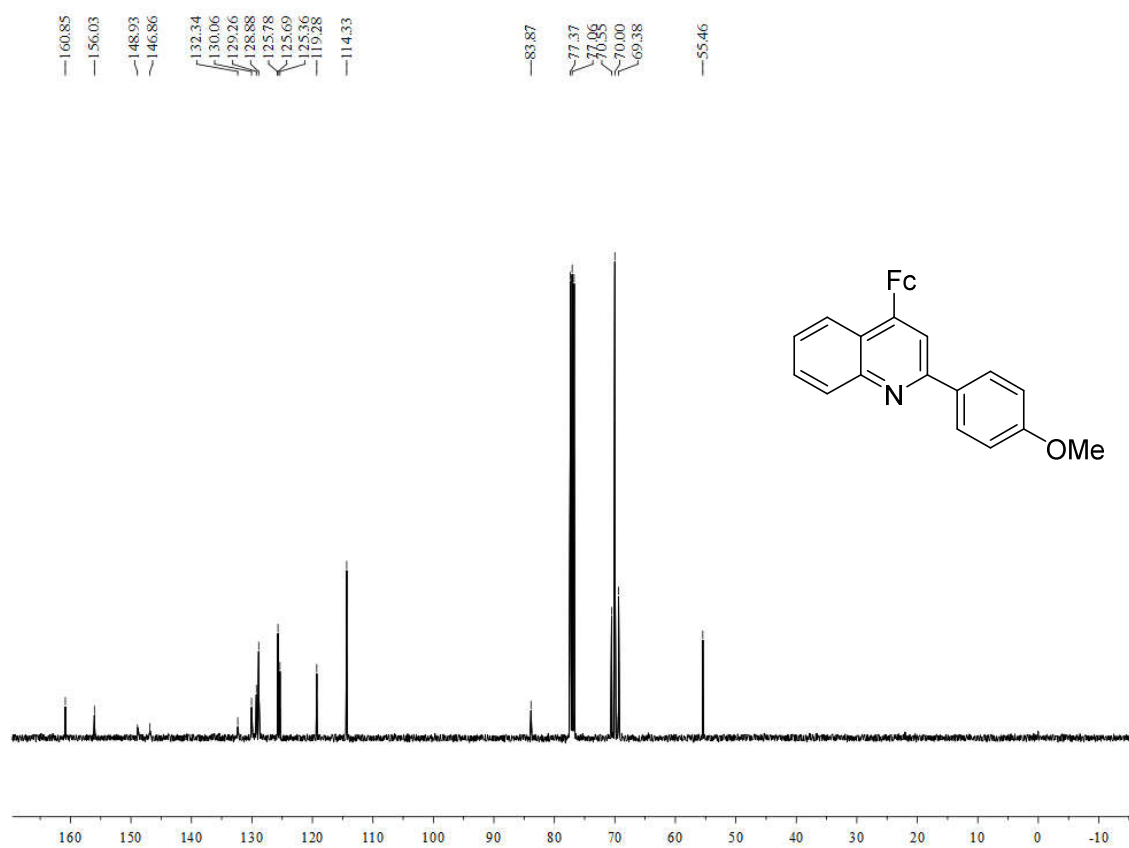

The  $^1\text{H}$  NMR of **4d**.

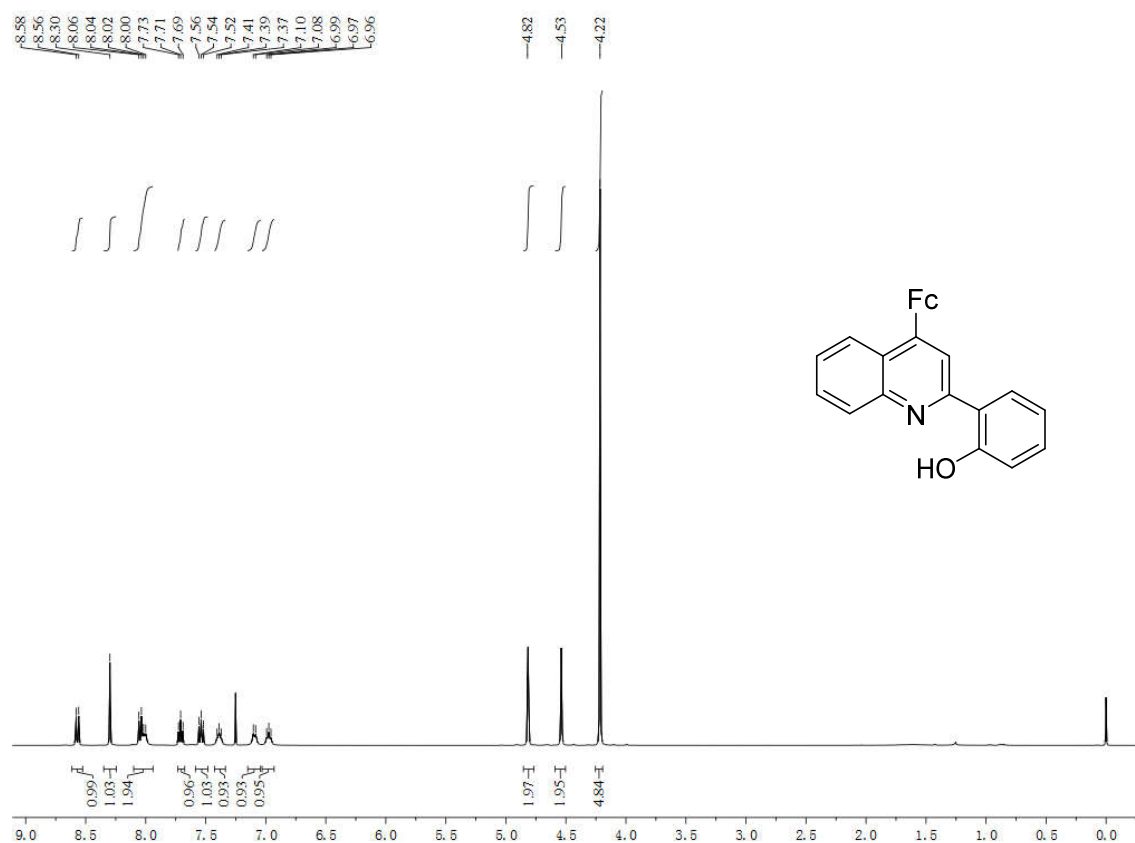

The  $^{13}\text{C}$  NMR of **4d**.

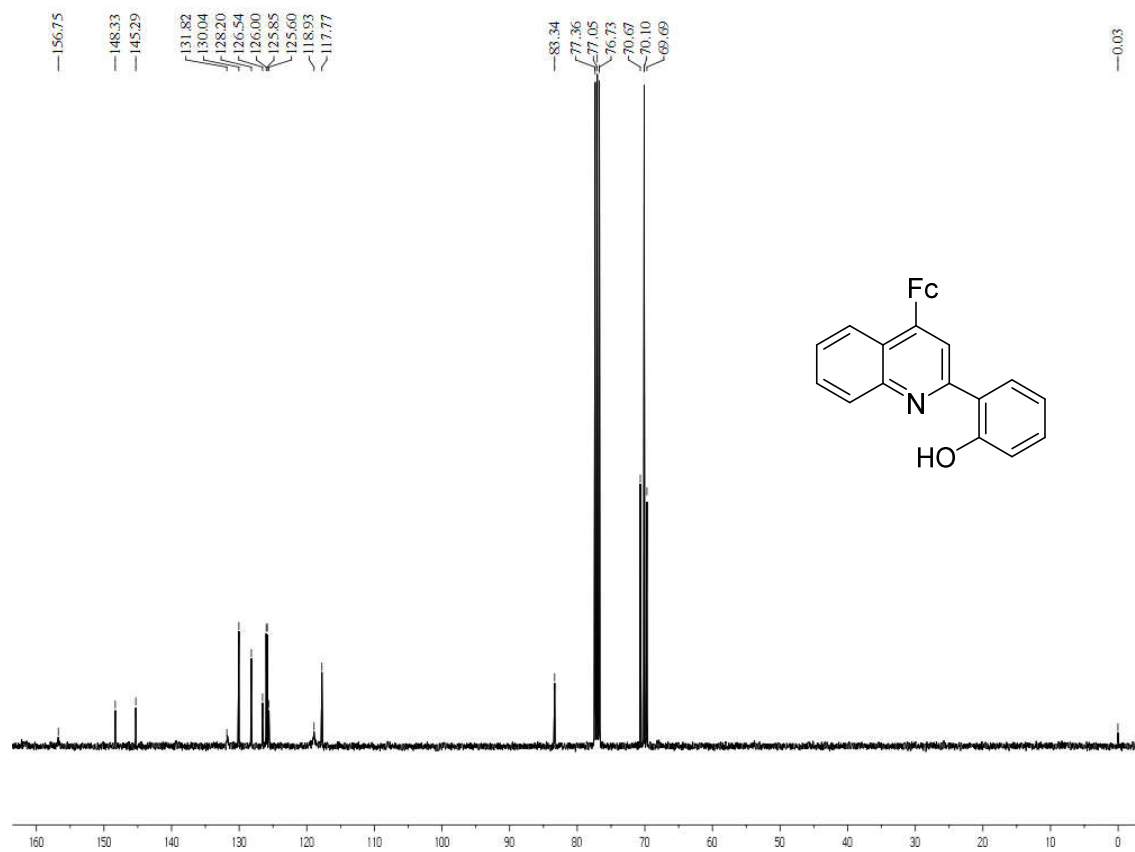



The  $^1\text{H}$  NMR of **4e**.

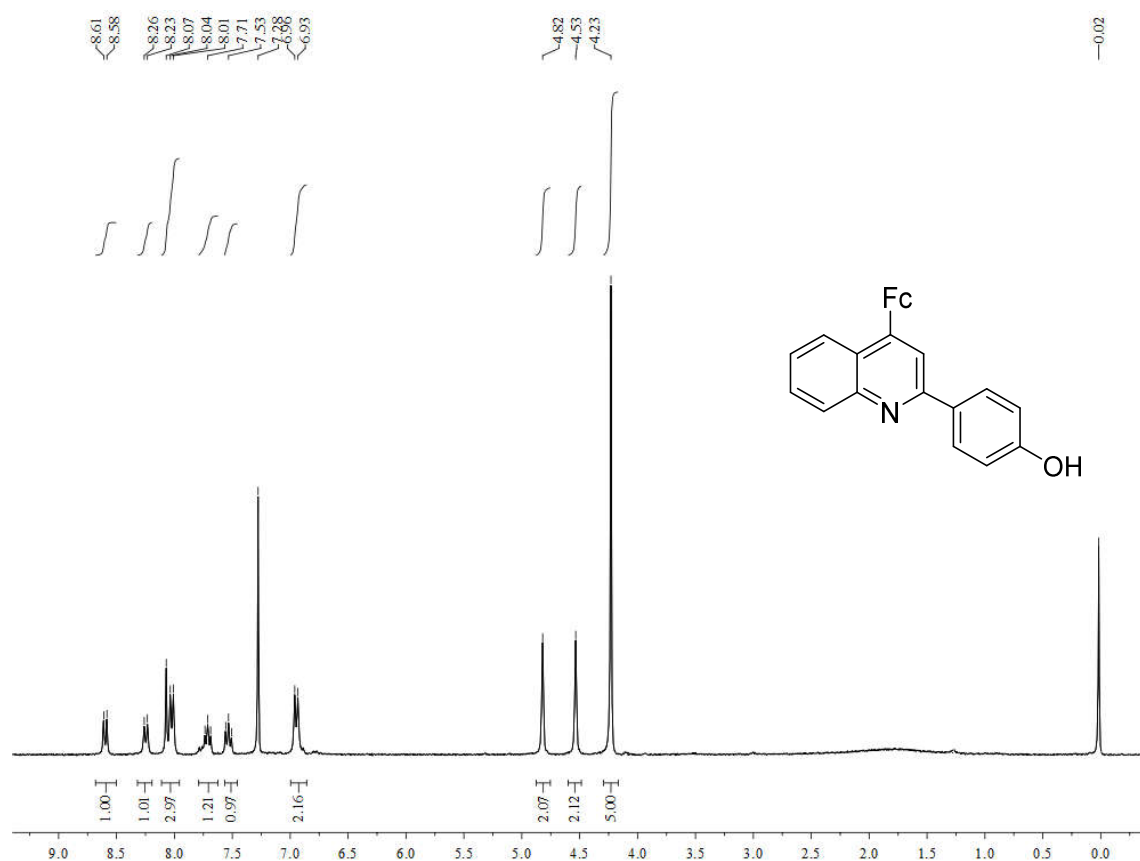

The  $^{13}\text{C}$  NMR of **4e**.

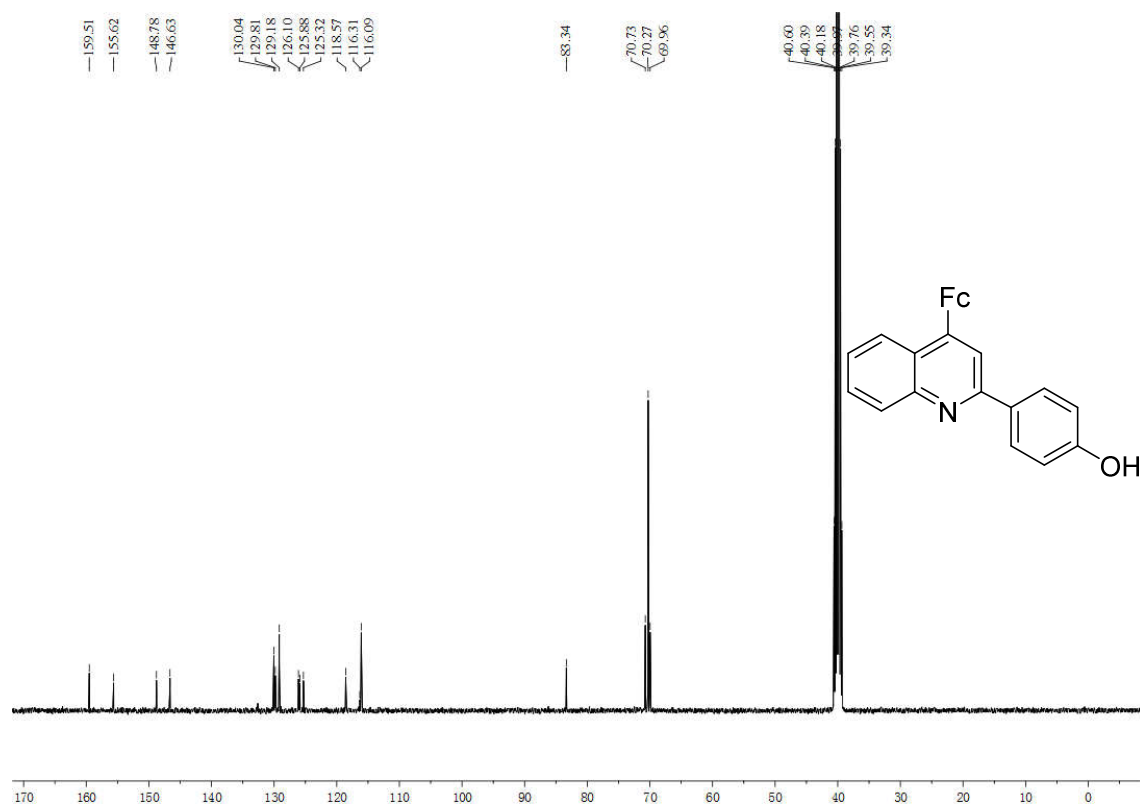

The  $^1\text{H}$  NMR of **4f**.

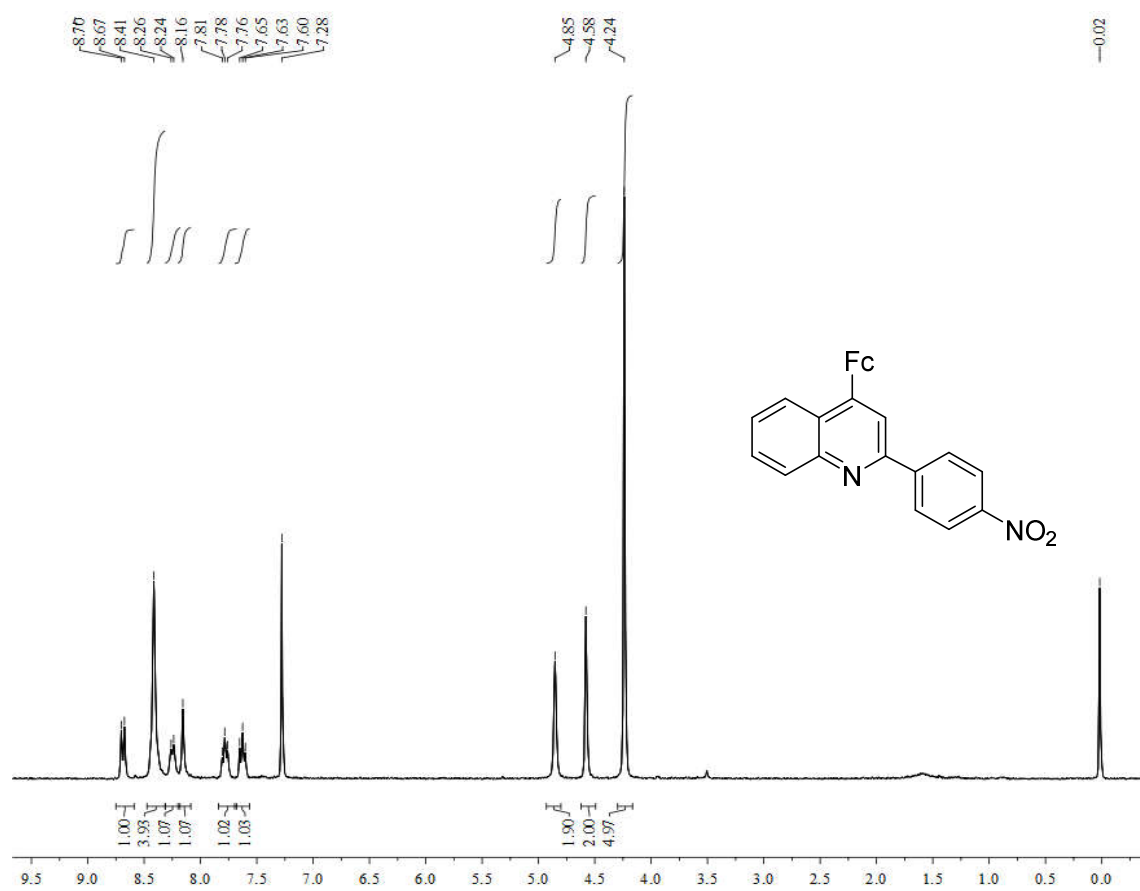

The  $^{13}\text{C}$  NMR of **4f**.

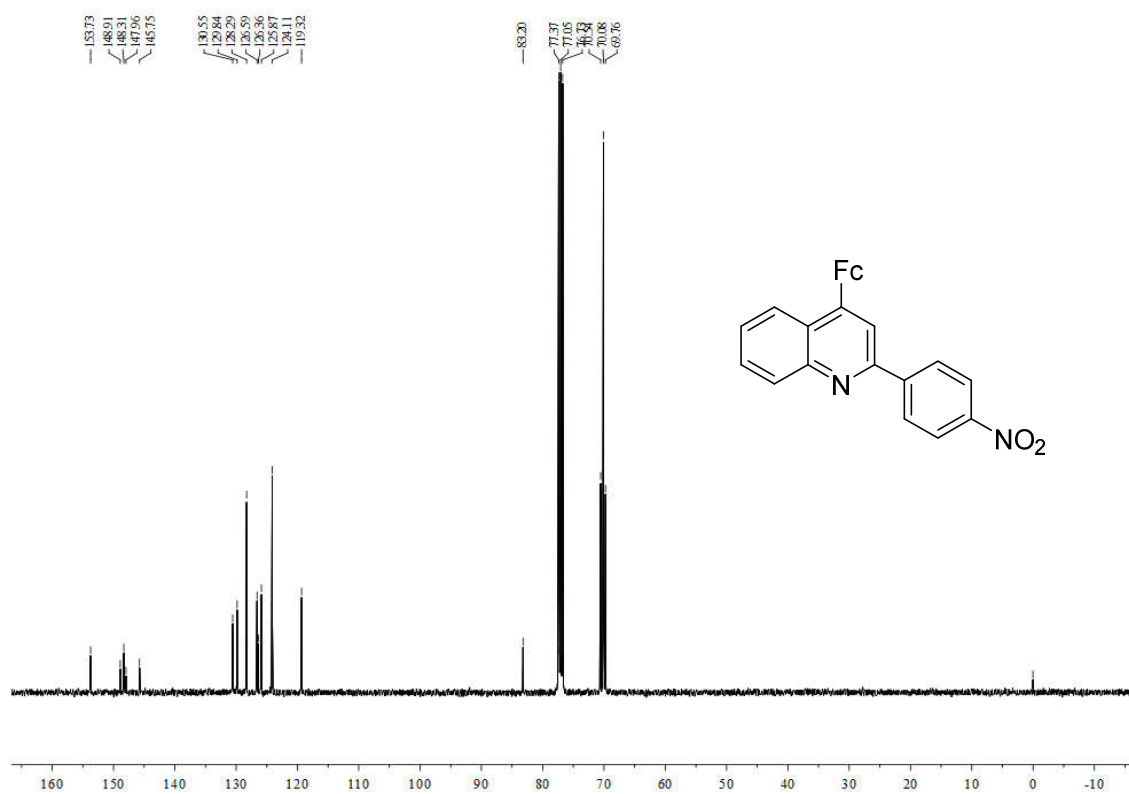

The  $^1\text{H}$  NMR of **4g**.

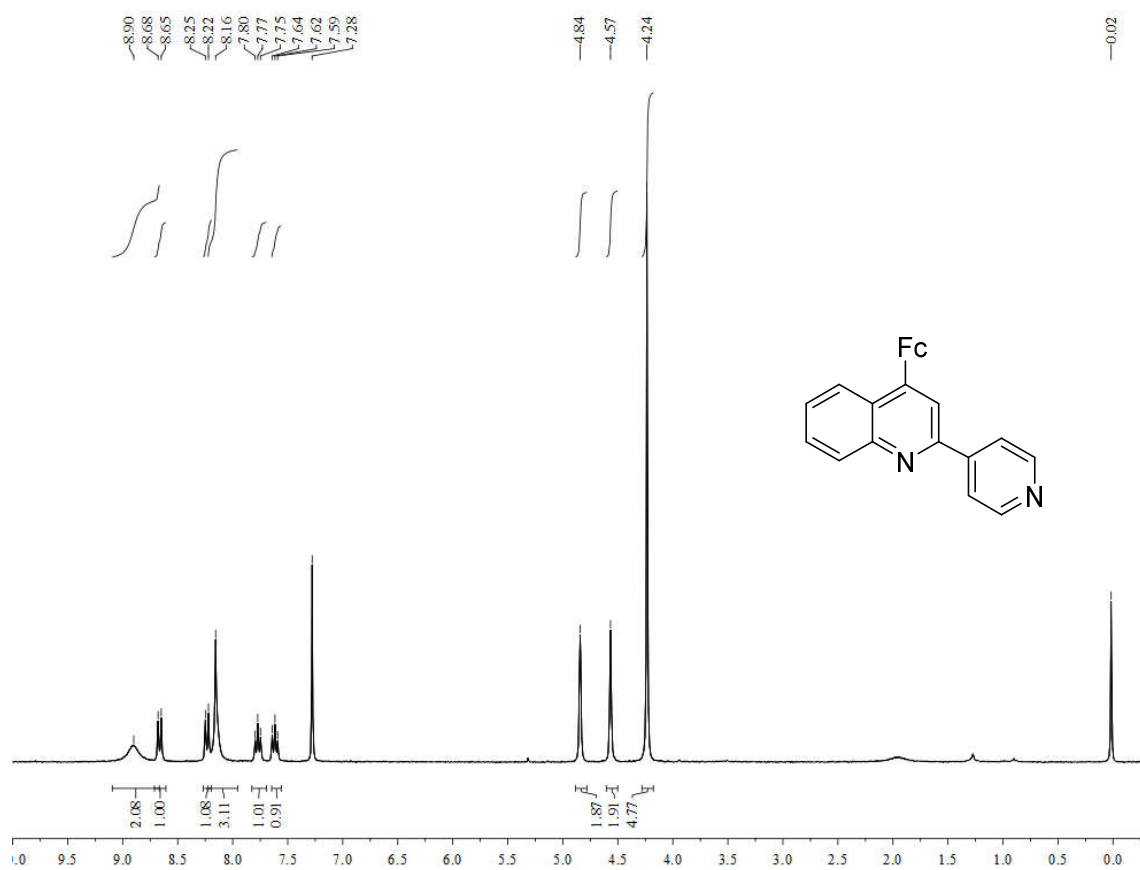

The  $^{13}\text{C}$  NMR of **4g**.

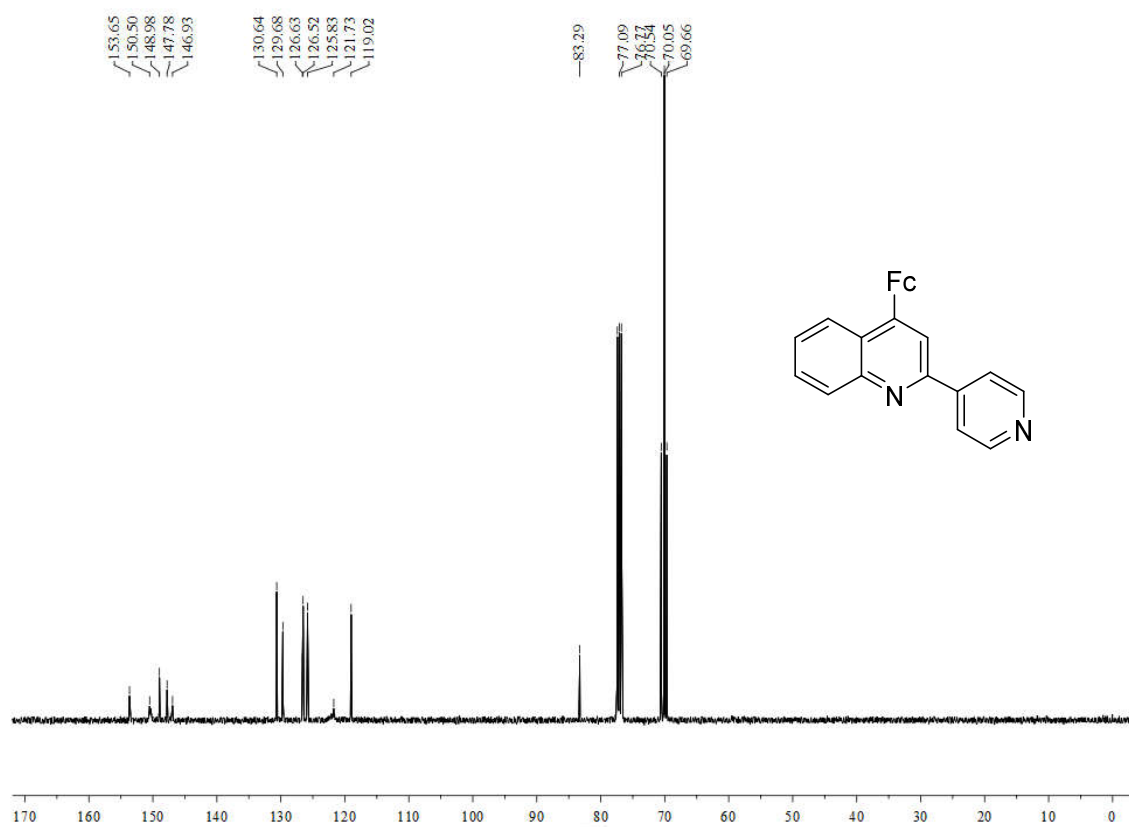

The  $^1\text{H}$  NMR of **4h**.

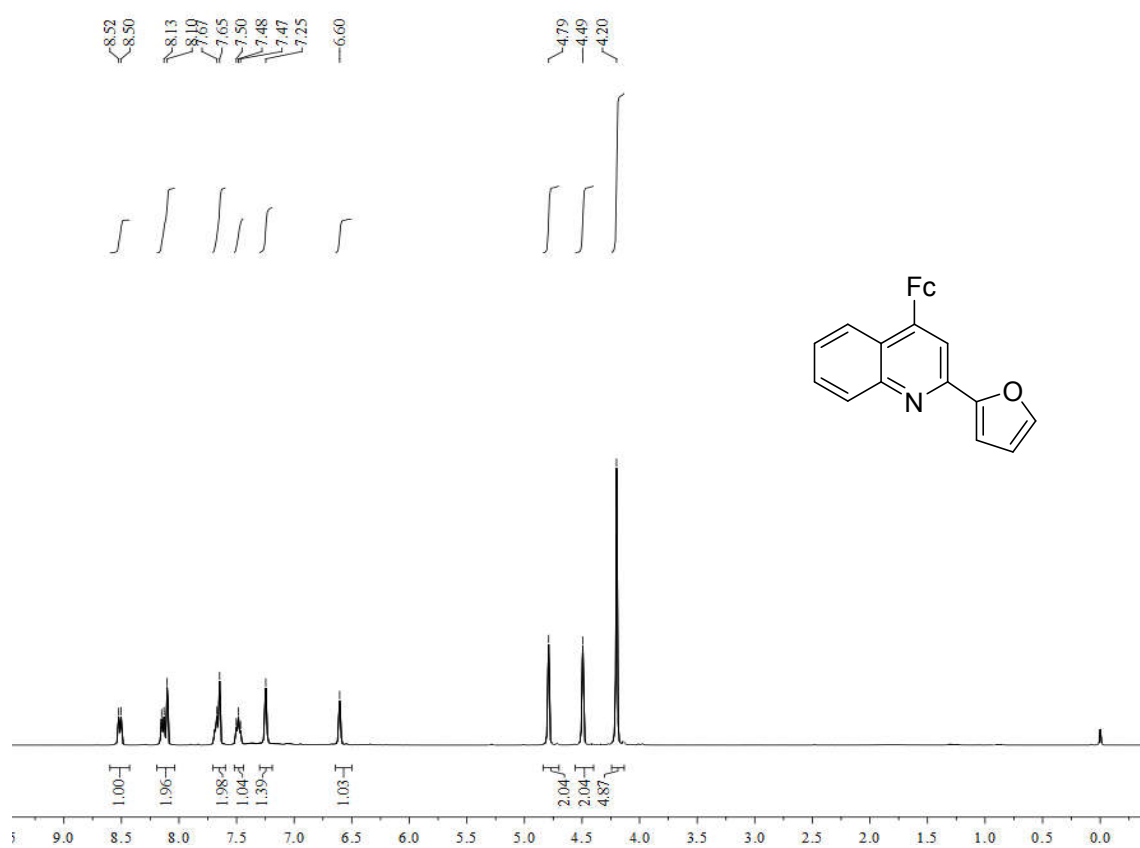

The  $^{13}\text{C}$  NMR of **4h**.

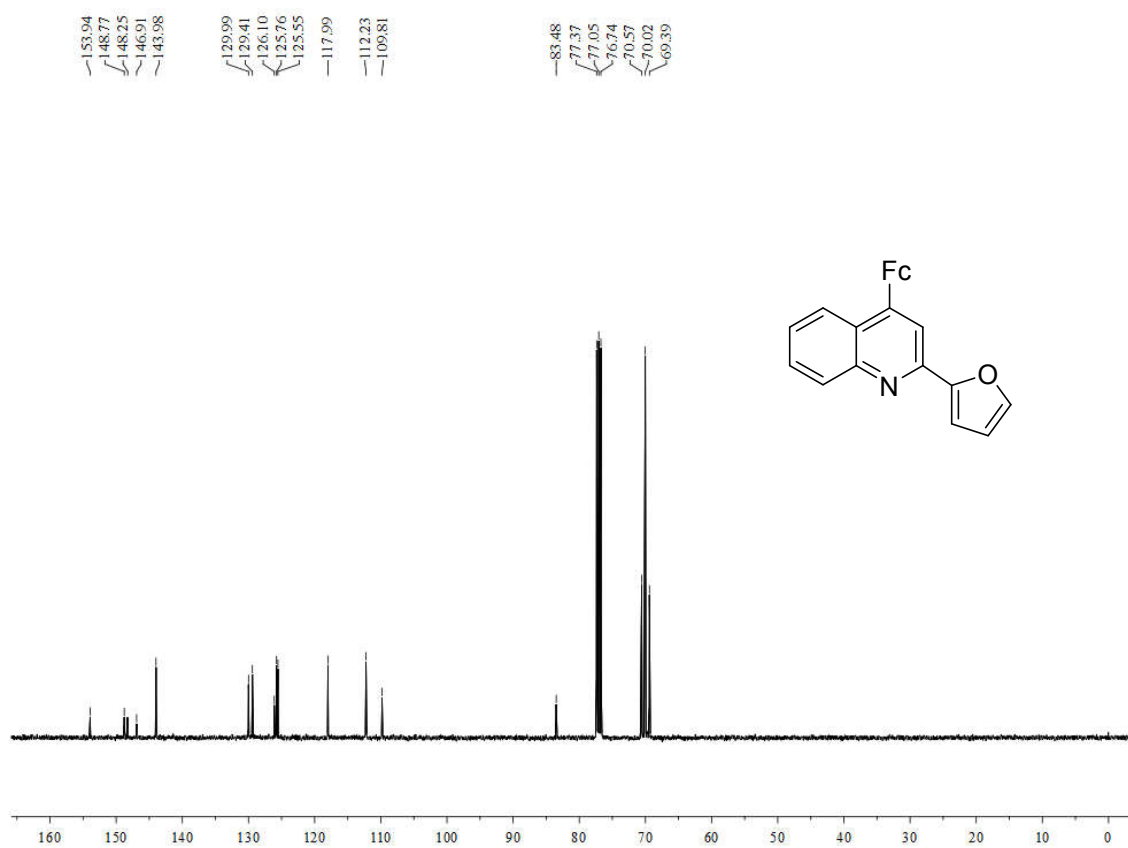

The  $^1\text{H}$  NMR of **4i**.

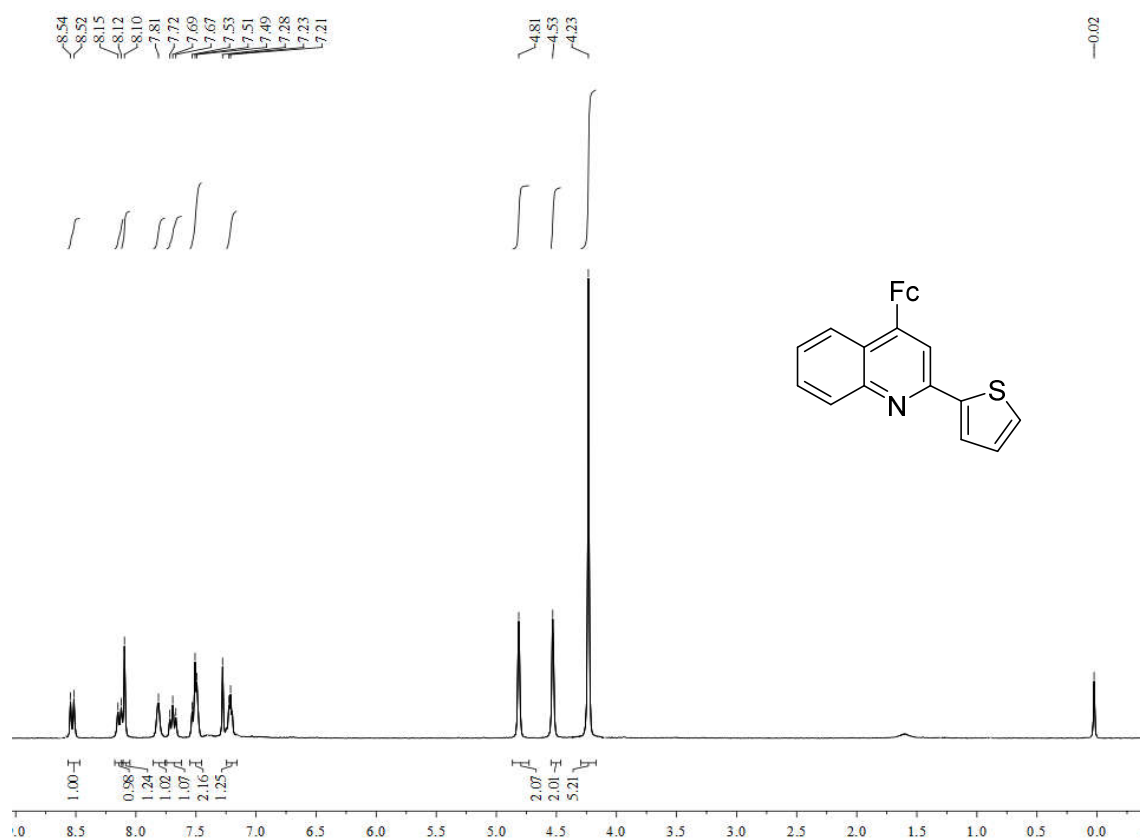

The  $^{13}\text{C}$  NMR of **4i**.

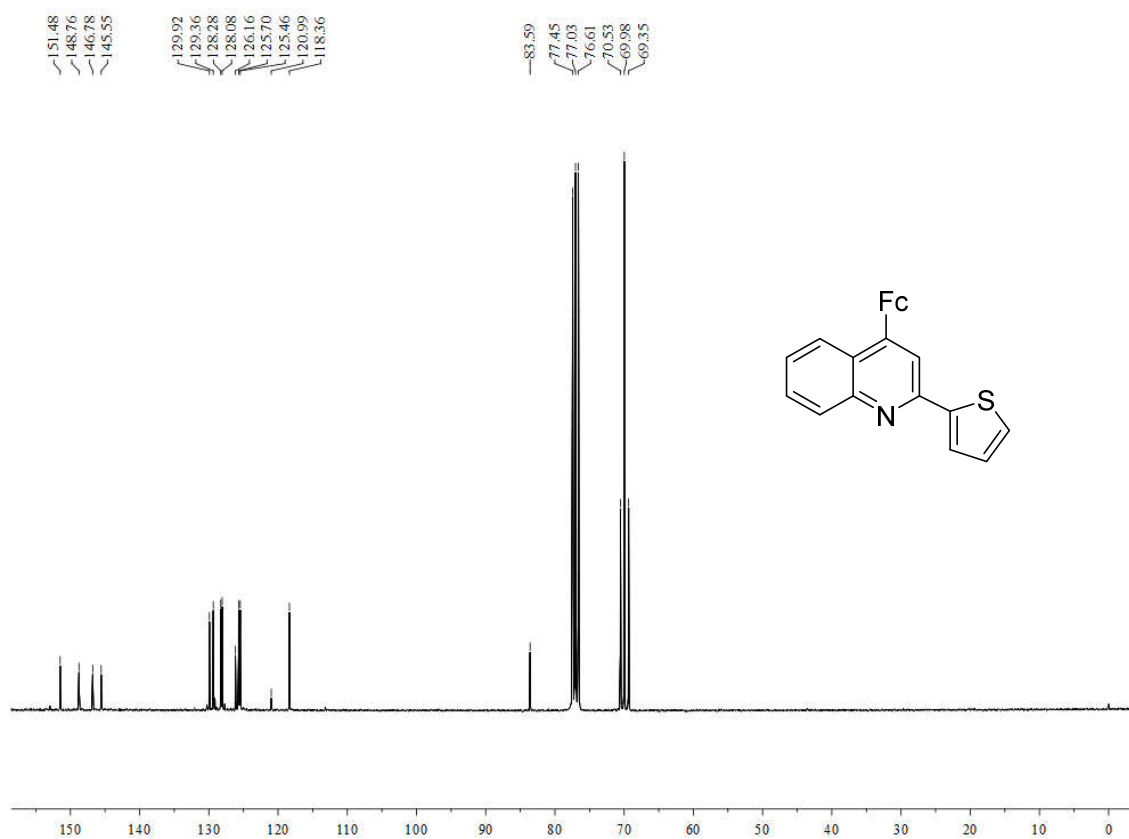

The  $^1\text{H}$  NMR of **4j**.

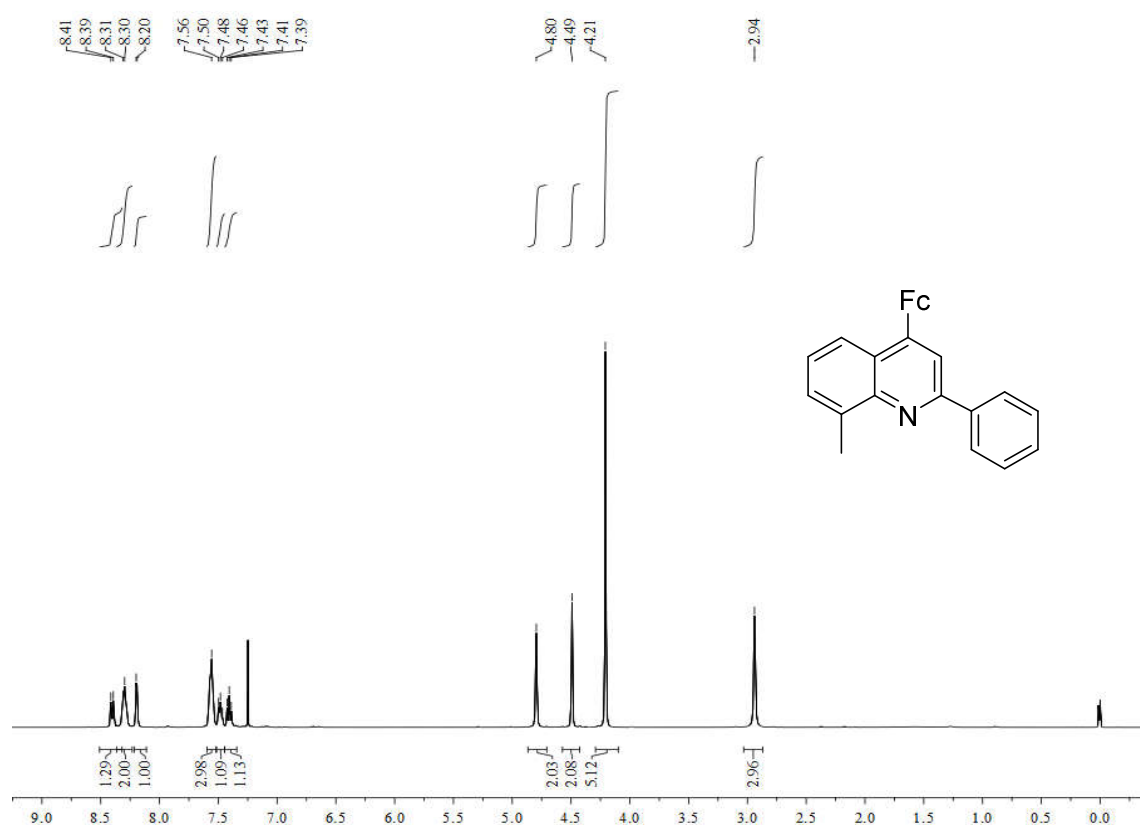

The  $^{13}\text{C}$  NMR of **4j**.

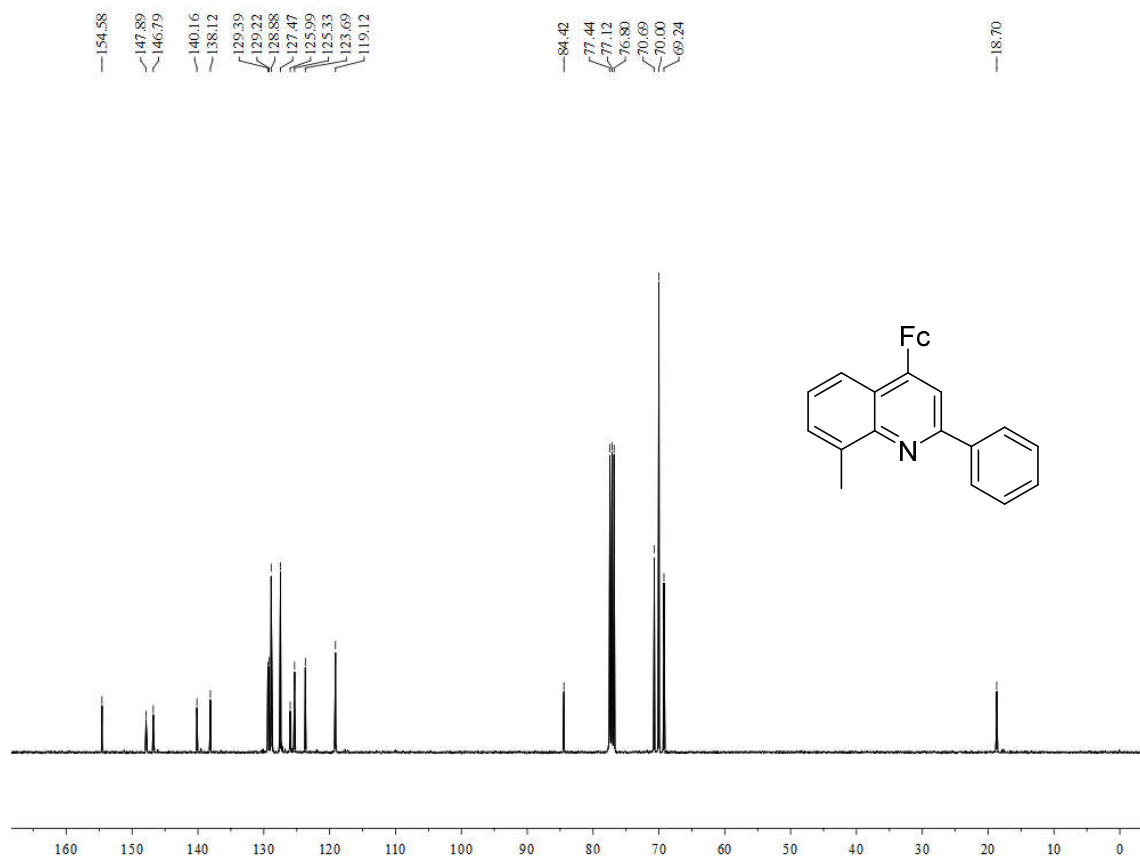

The  $^1\text{H}$  NMR of **4k**.

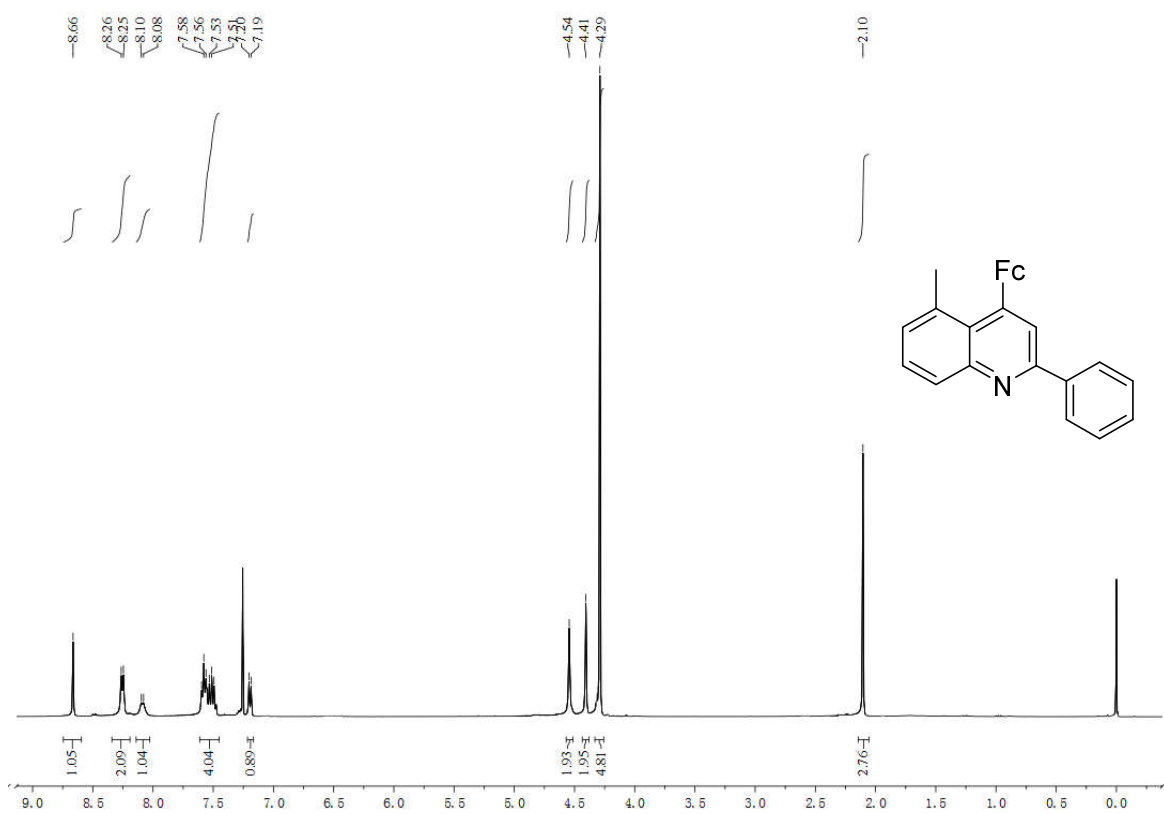

The  $^{13}\text{C}$  NMR of **4k**.

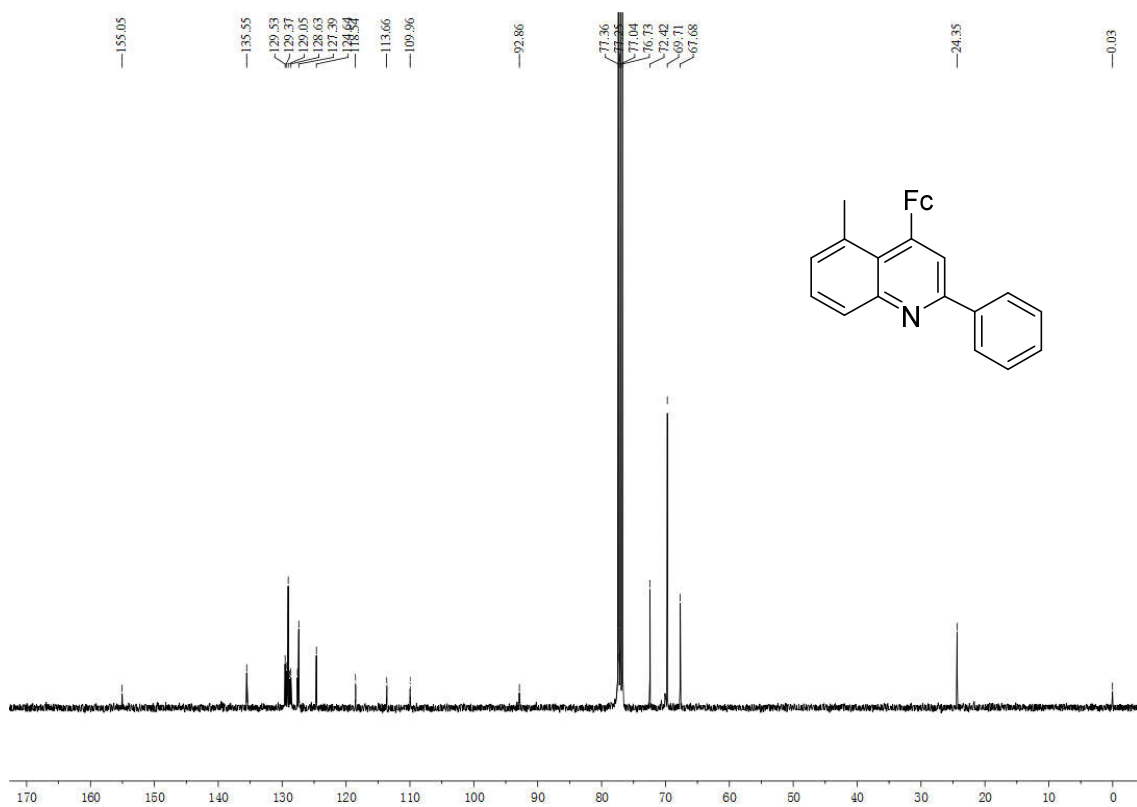

The  $^1\text{H}$  NMR of **4k'**.

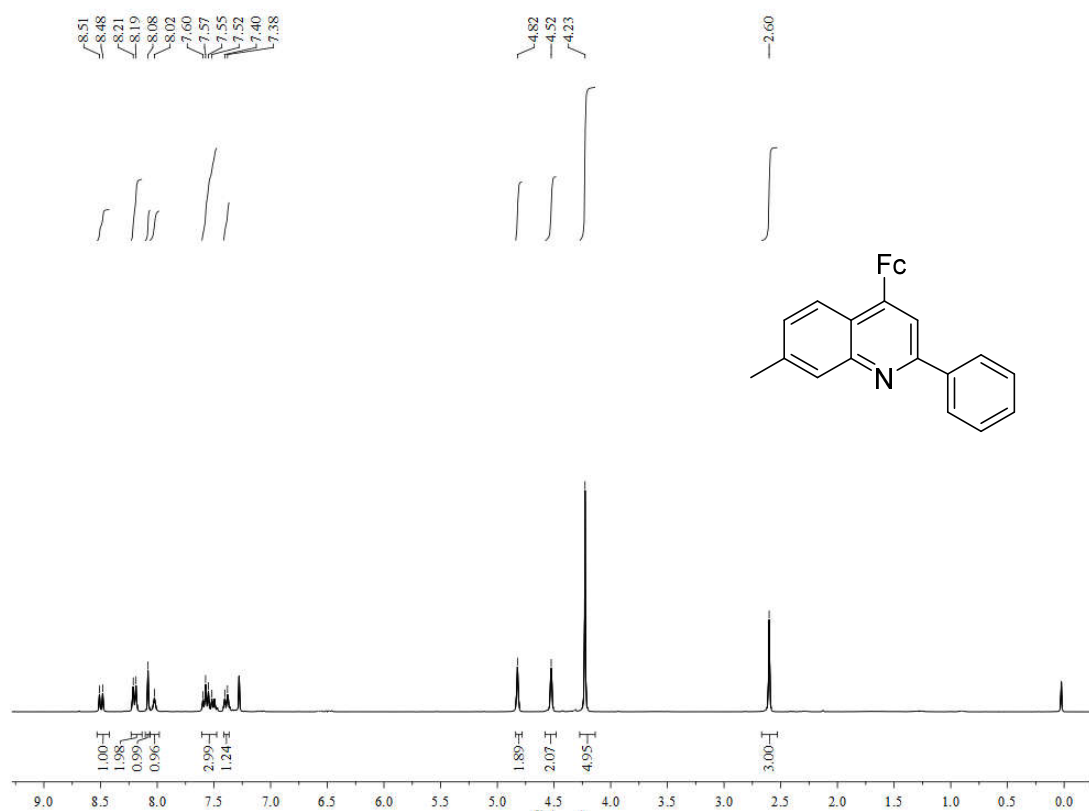

The  $^{13}\text{C}$  NMR of **4k'**.

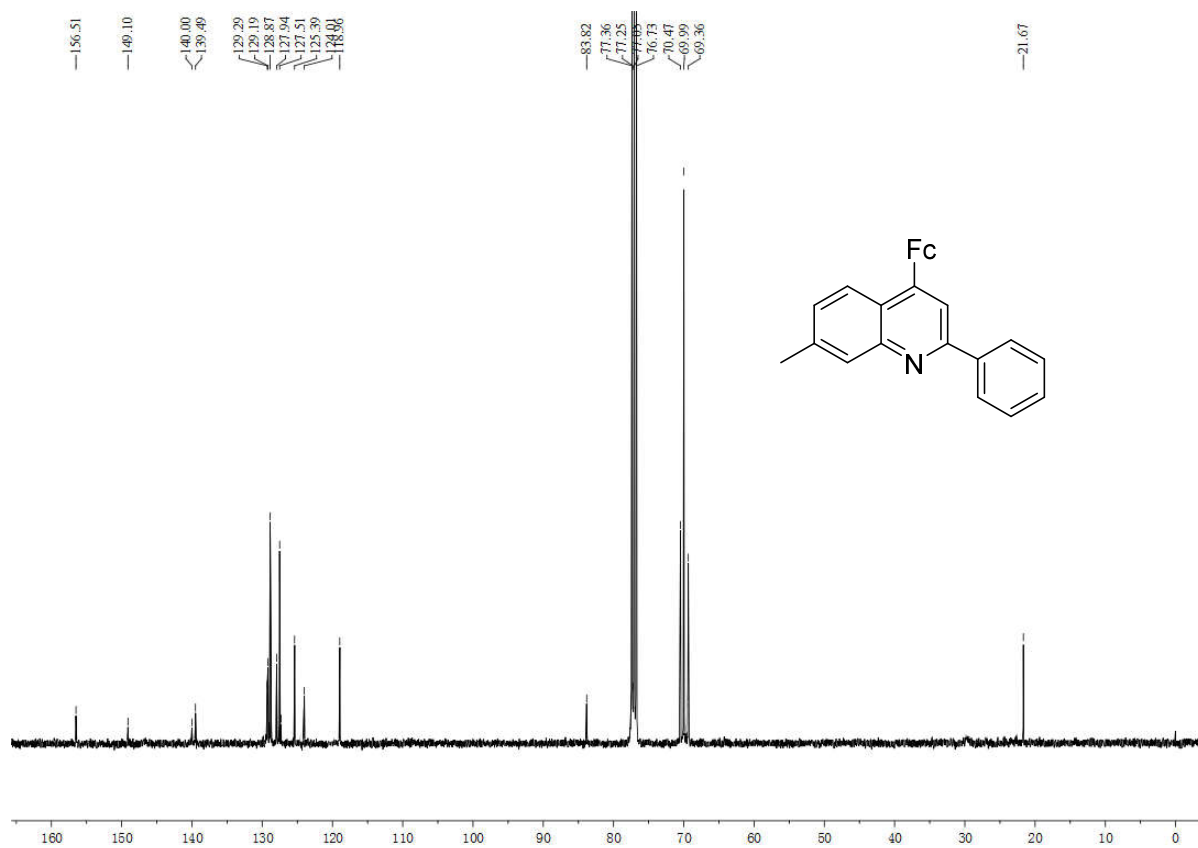



The  $^1\text{H}$  NMR of **4l**.

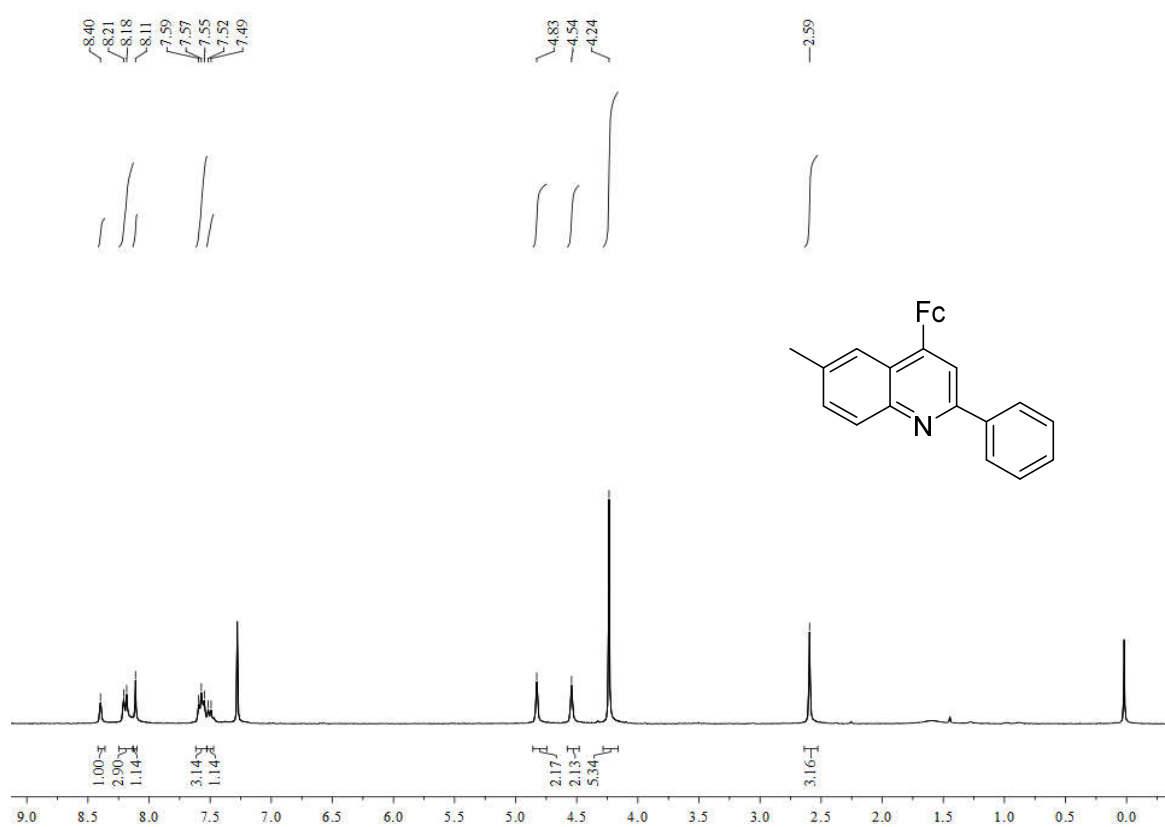

The  $^{13}\text{C}$  NMR of **4l**.

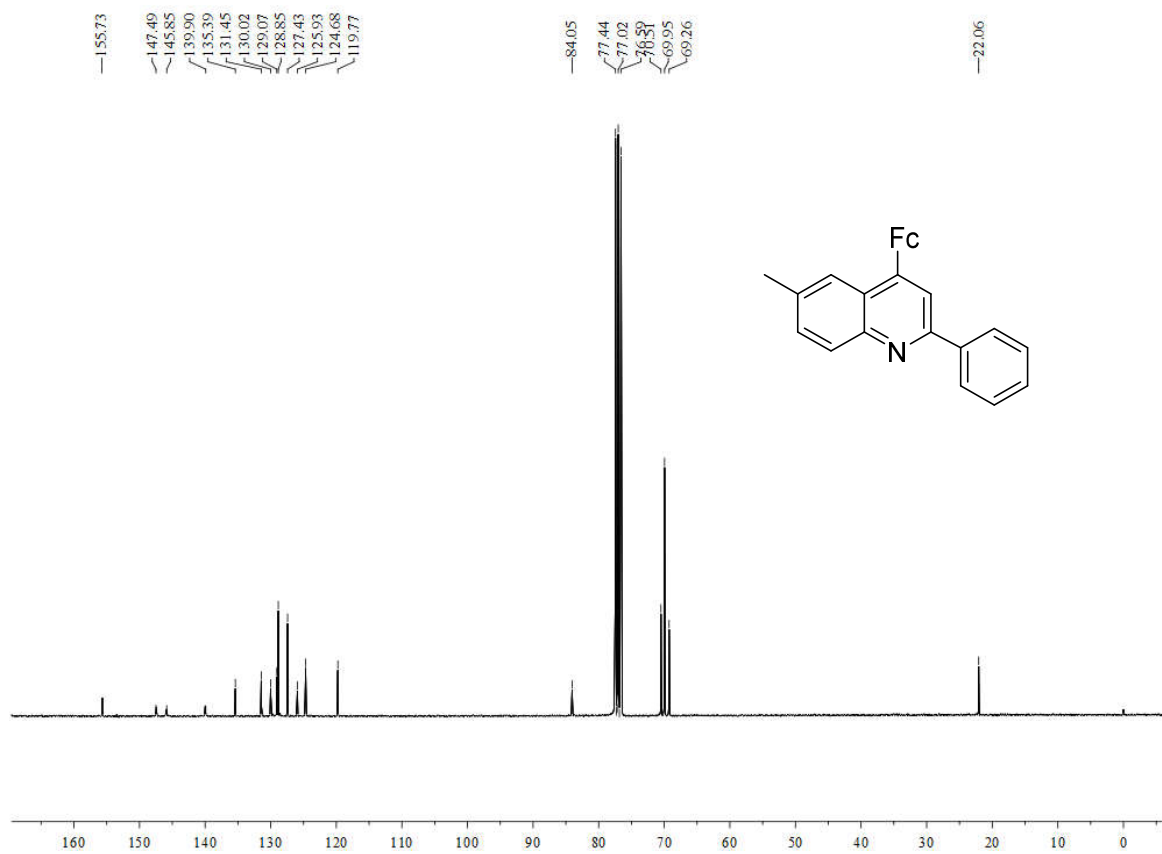

The  $^1\text{H}$  NMR of **4m**.

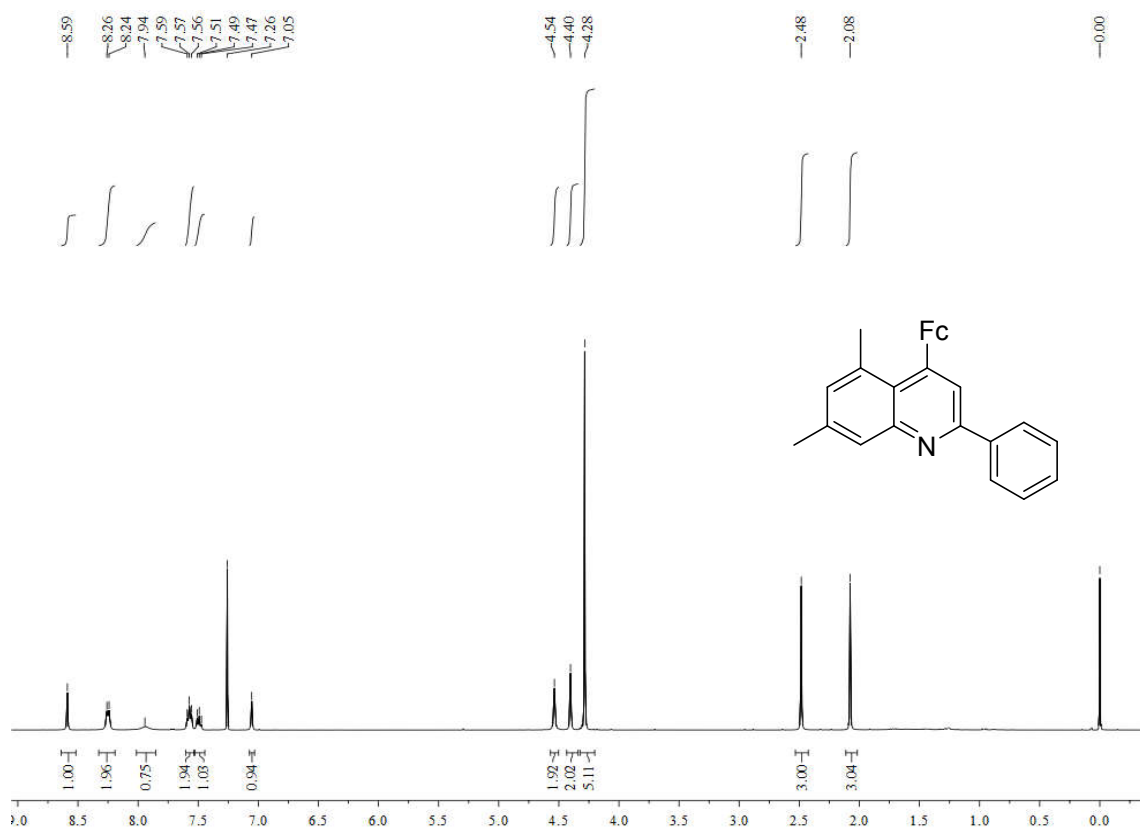

The  $^{13}\text{C}$  NMR of **4m**.

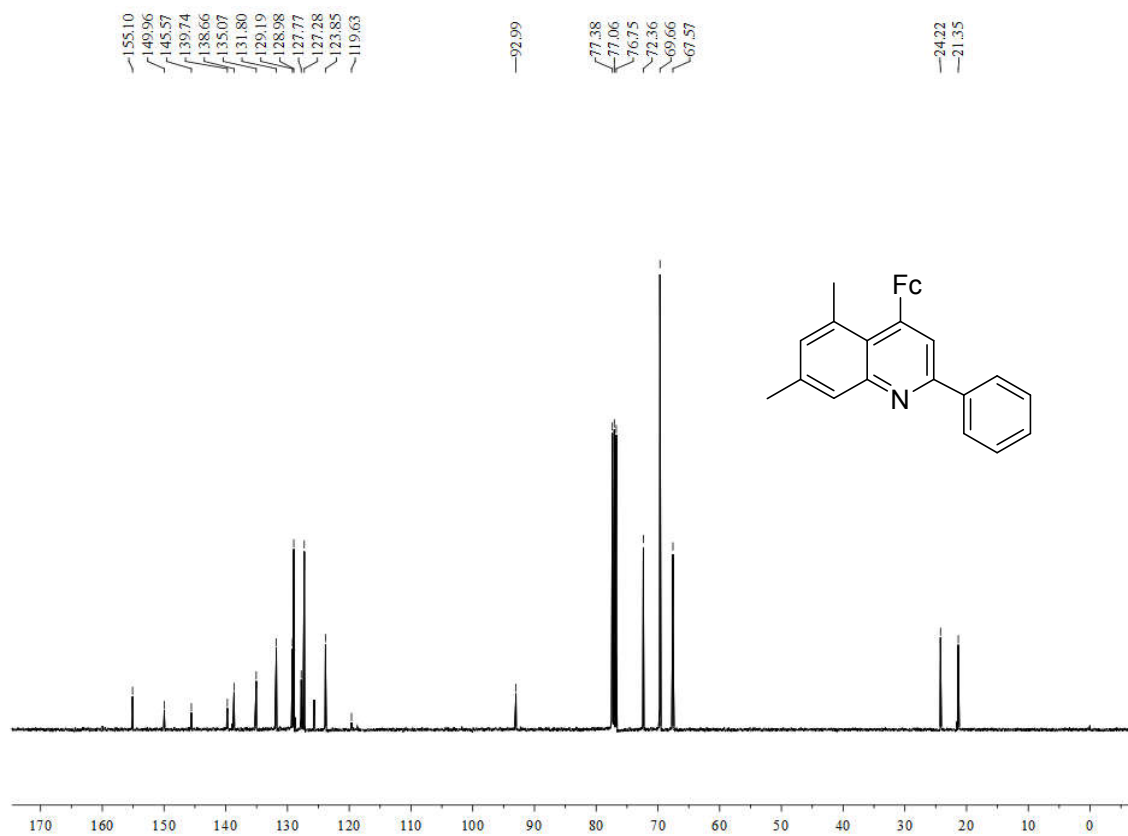

The  $^1\text{H}$  NMR of **4n**.

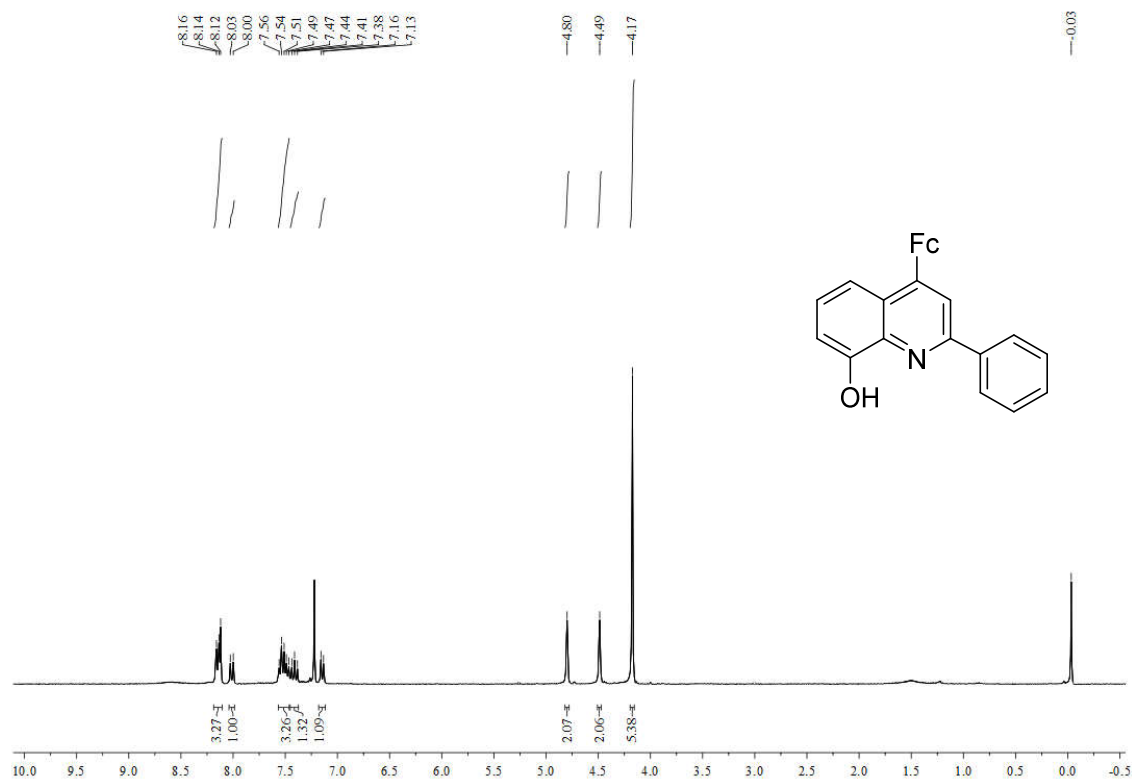

The  $^{13}\text{C}$  NMR of **4n**.

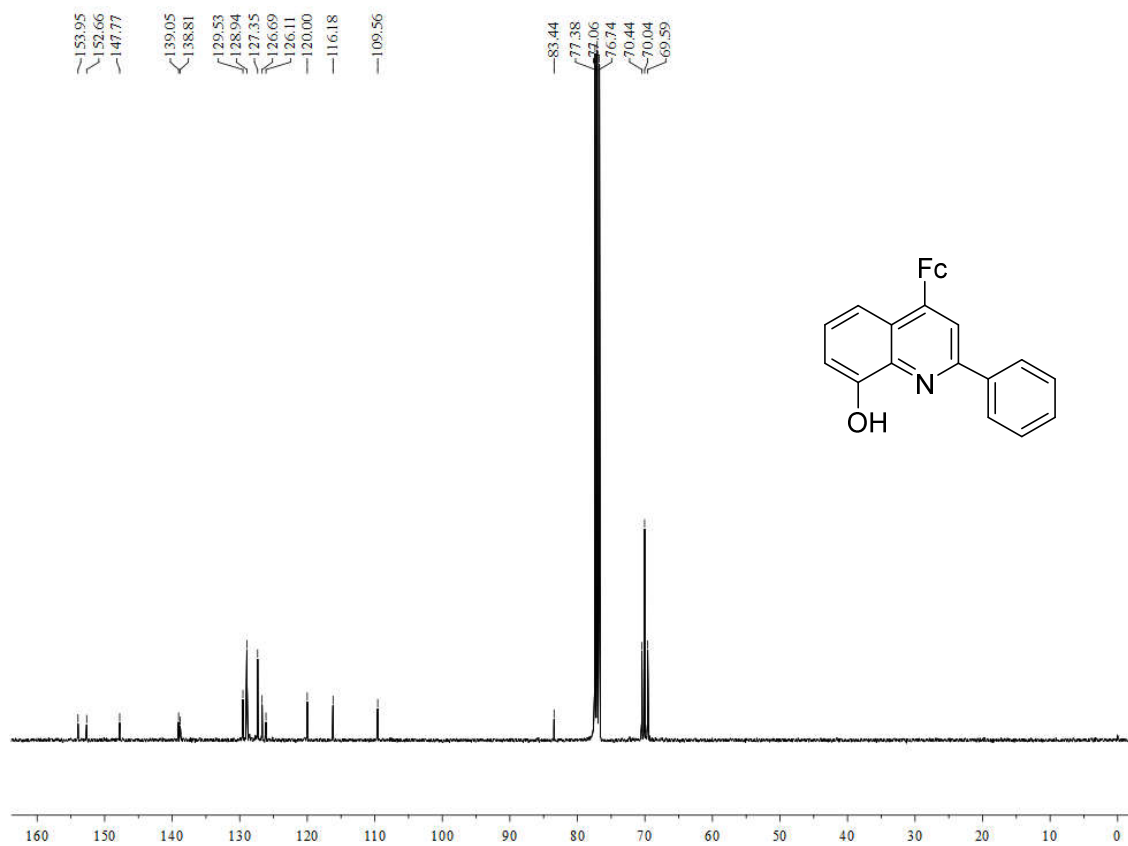

The  $^1\text{H}$  NMR of **4o**.

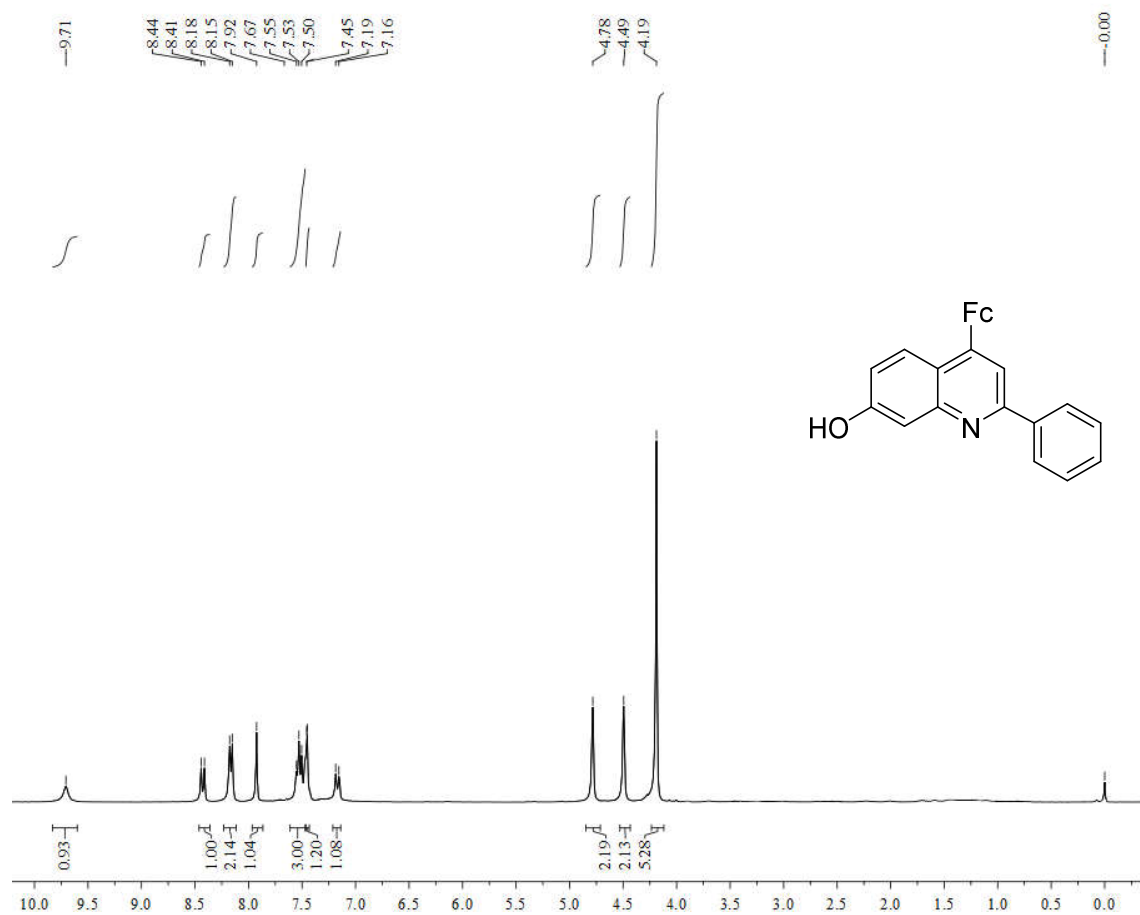

The  $^{13}\text{C}$  NMR of **4o**.

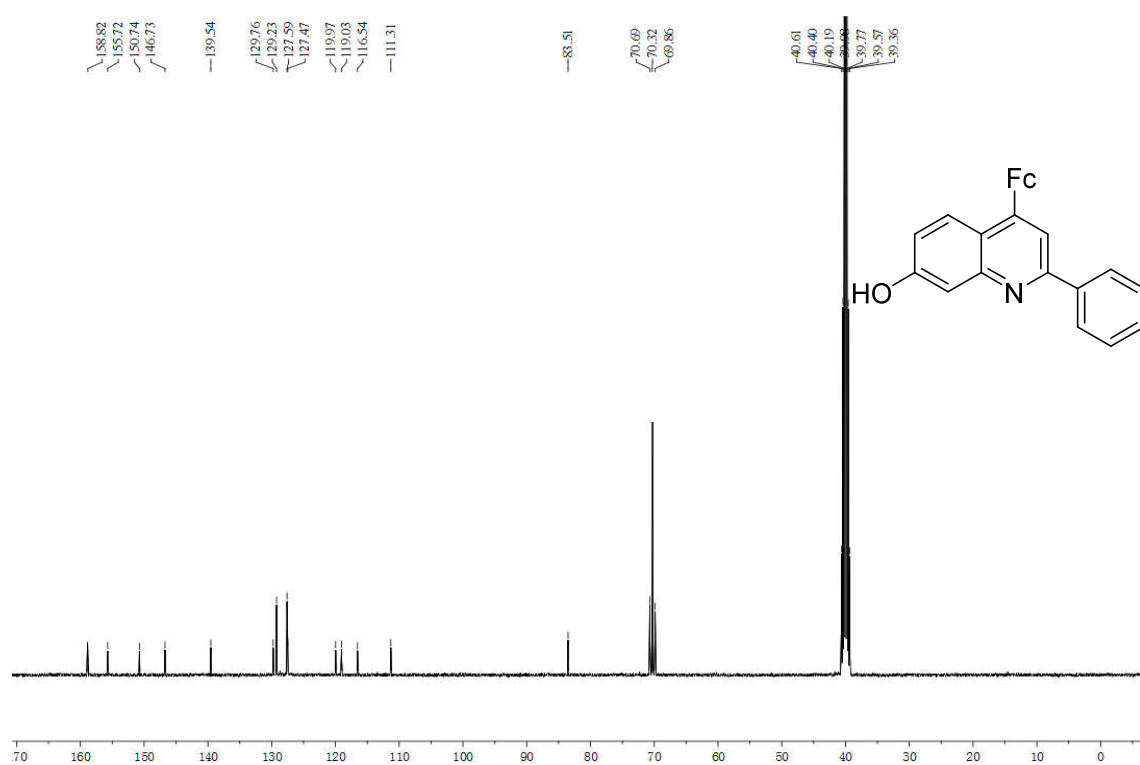

The  $^1\text{H}$  NMR of **4p**.

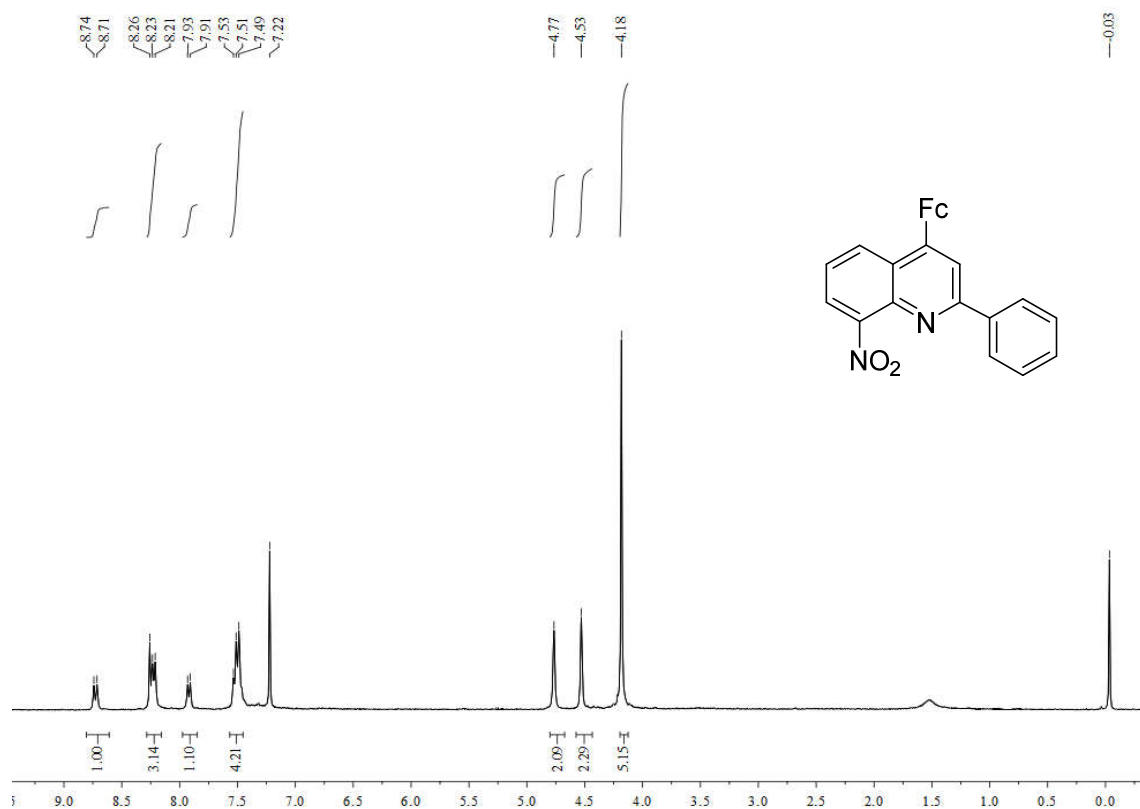

The  $^{13}\text{C}$  NMR of **4p**.

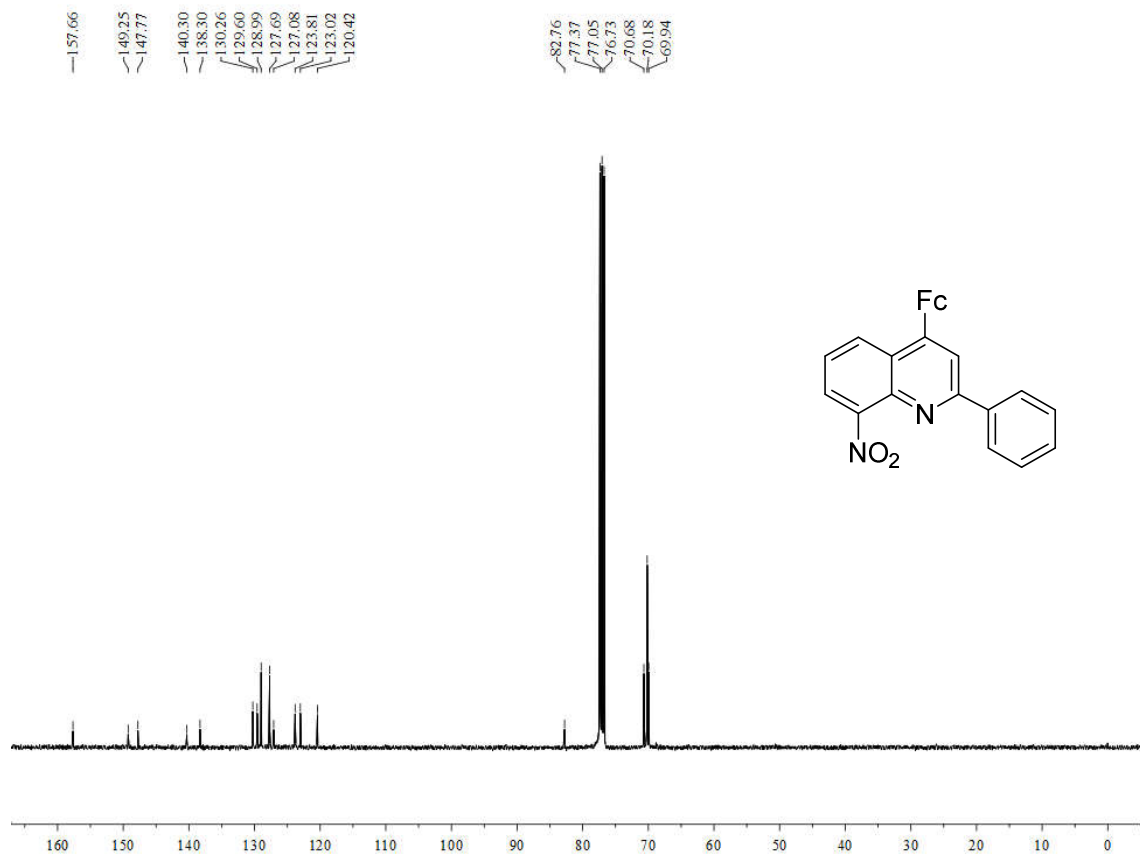

The  $^1\text{H}$  NMR of **4q**.

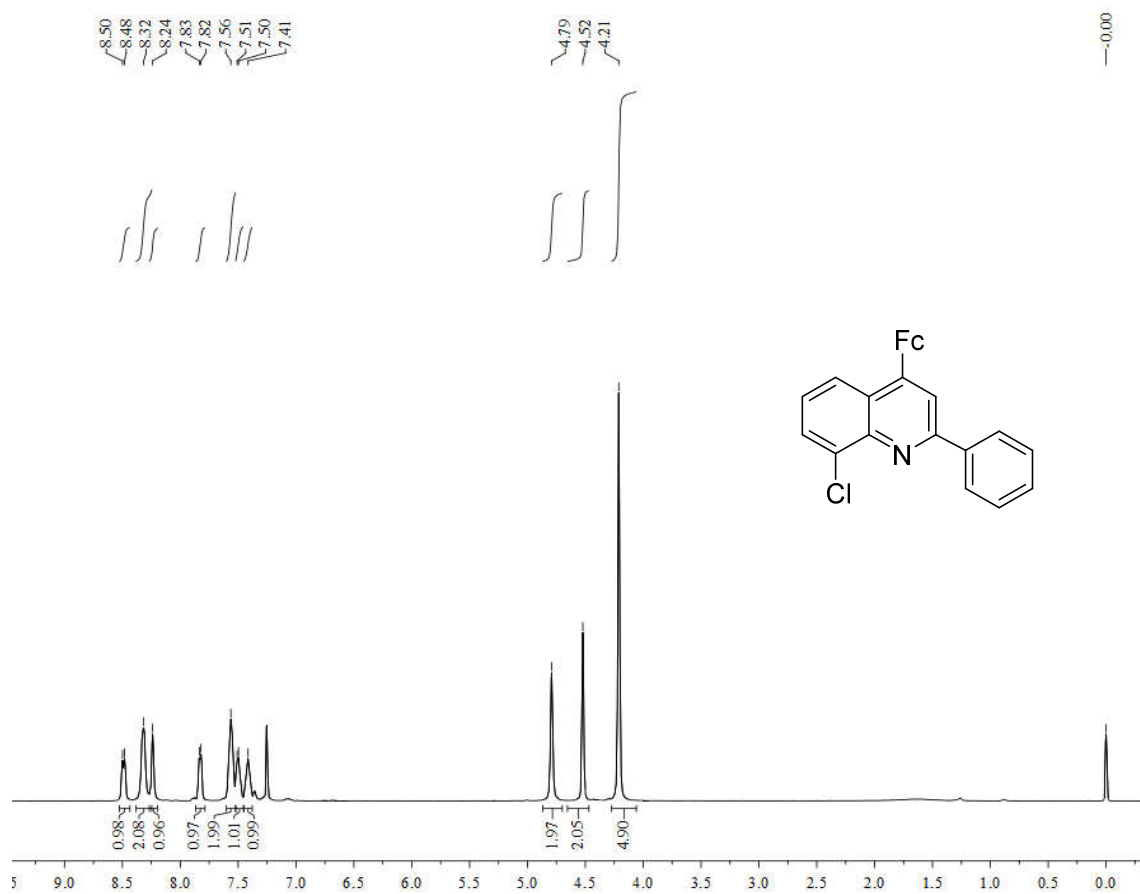

The  $^{13}\text{C}$  NMR of **4q**.

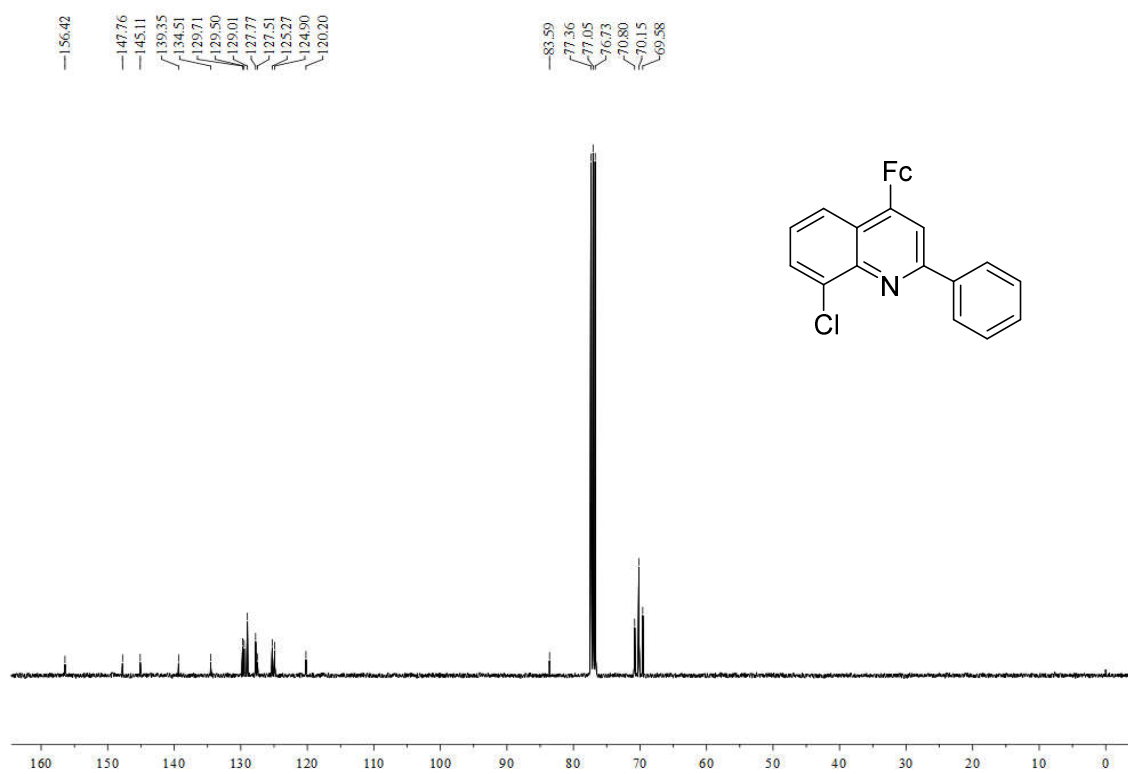

The  $^1\text{H}$  NMR of **4r**.

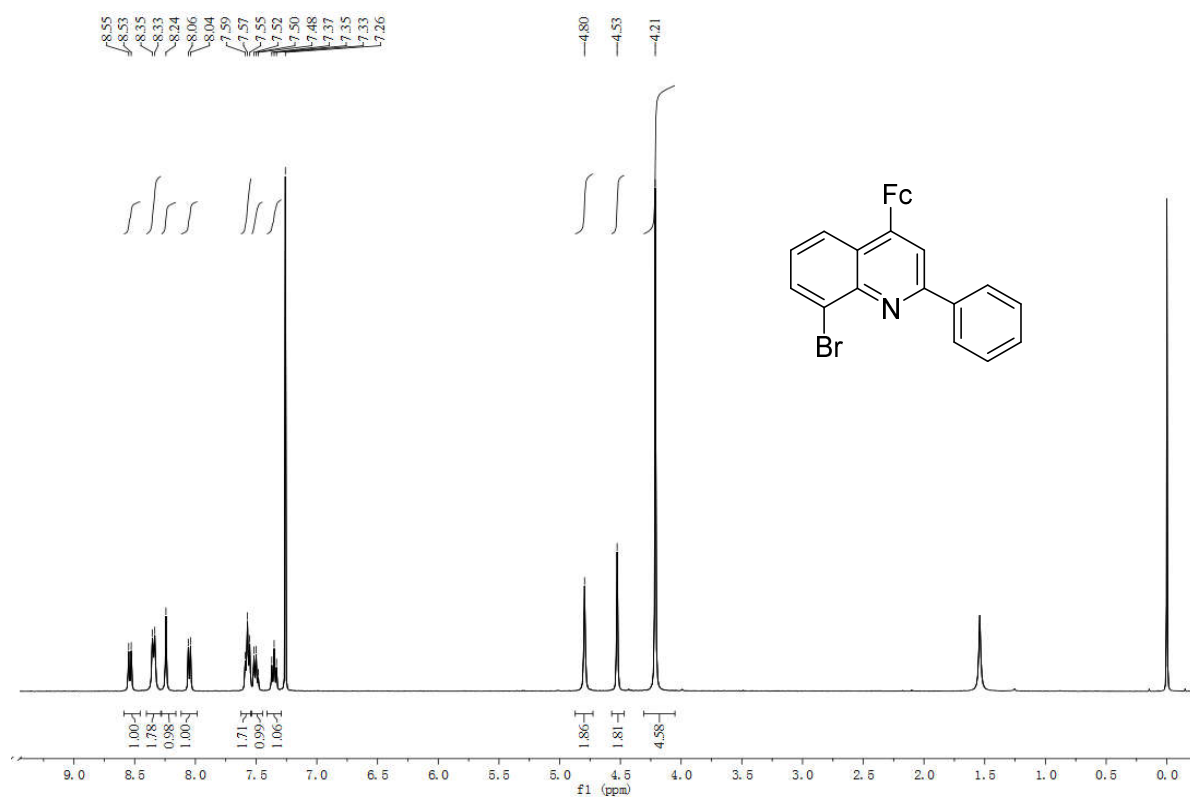

The  $^{13}\text{C}$  NMR of **4r**.

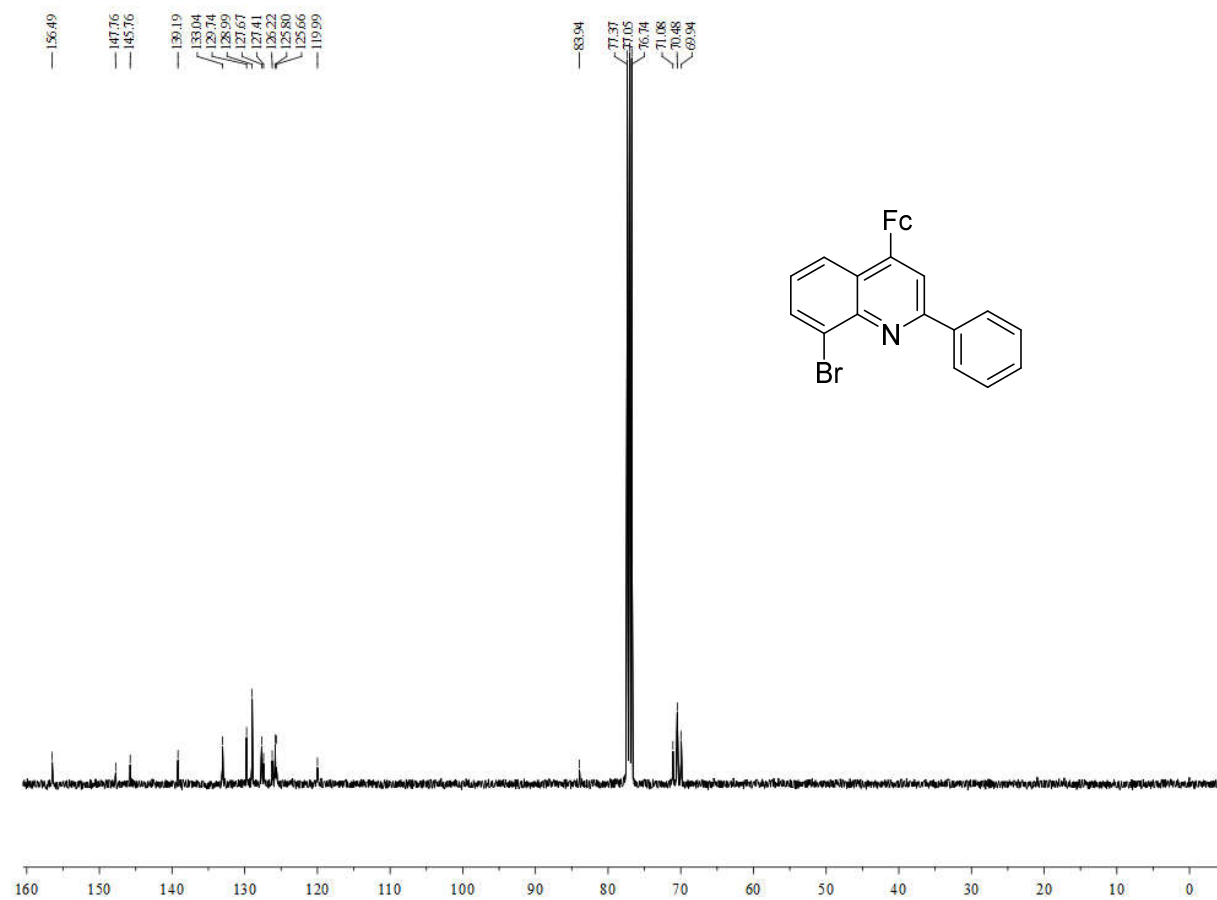

The  $^1\text{H}$  NMR of **4s**.

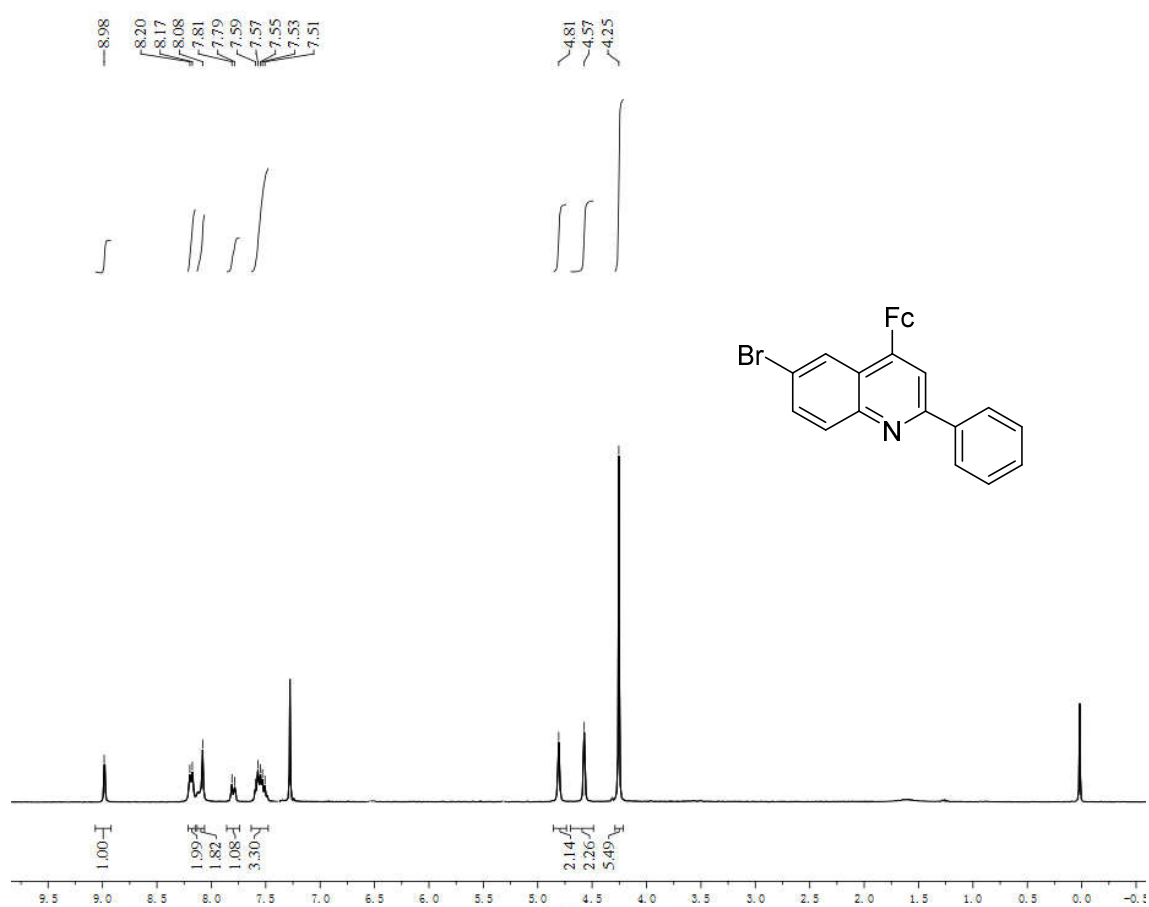

The  $^{13}\text{C}$  NMR of **4s**.

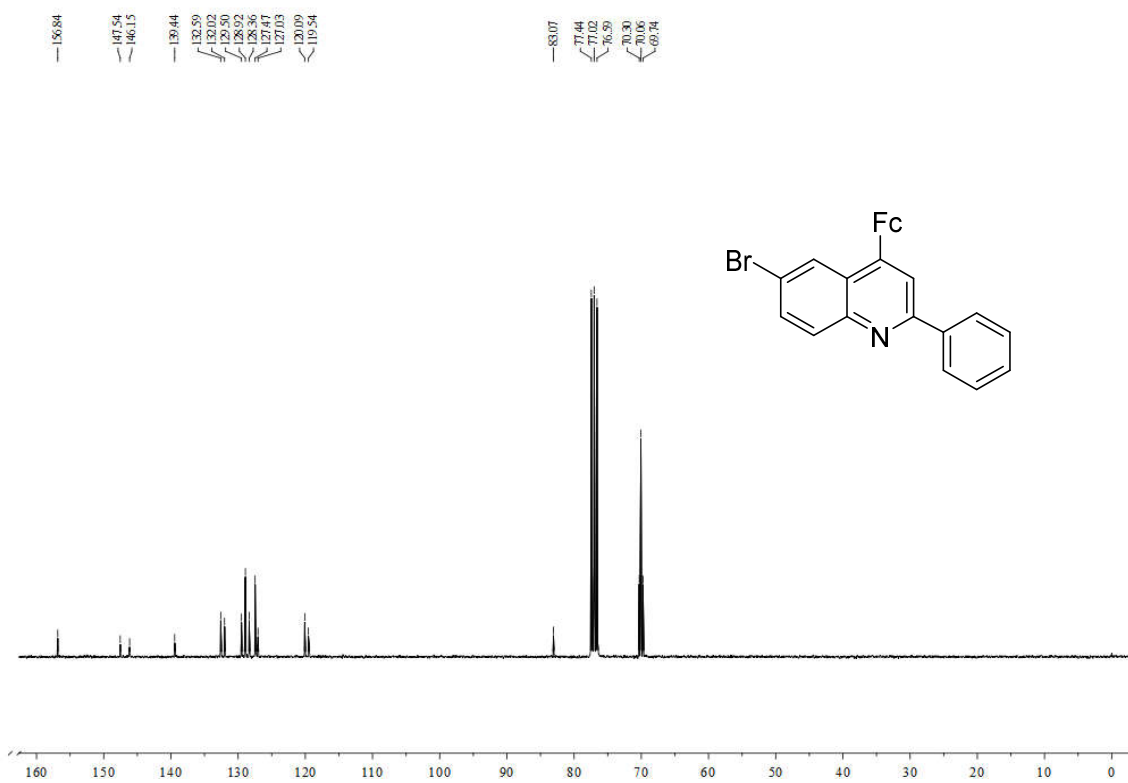



The  $^1\text{H}$  NMR of **4t**.

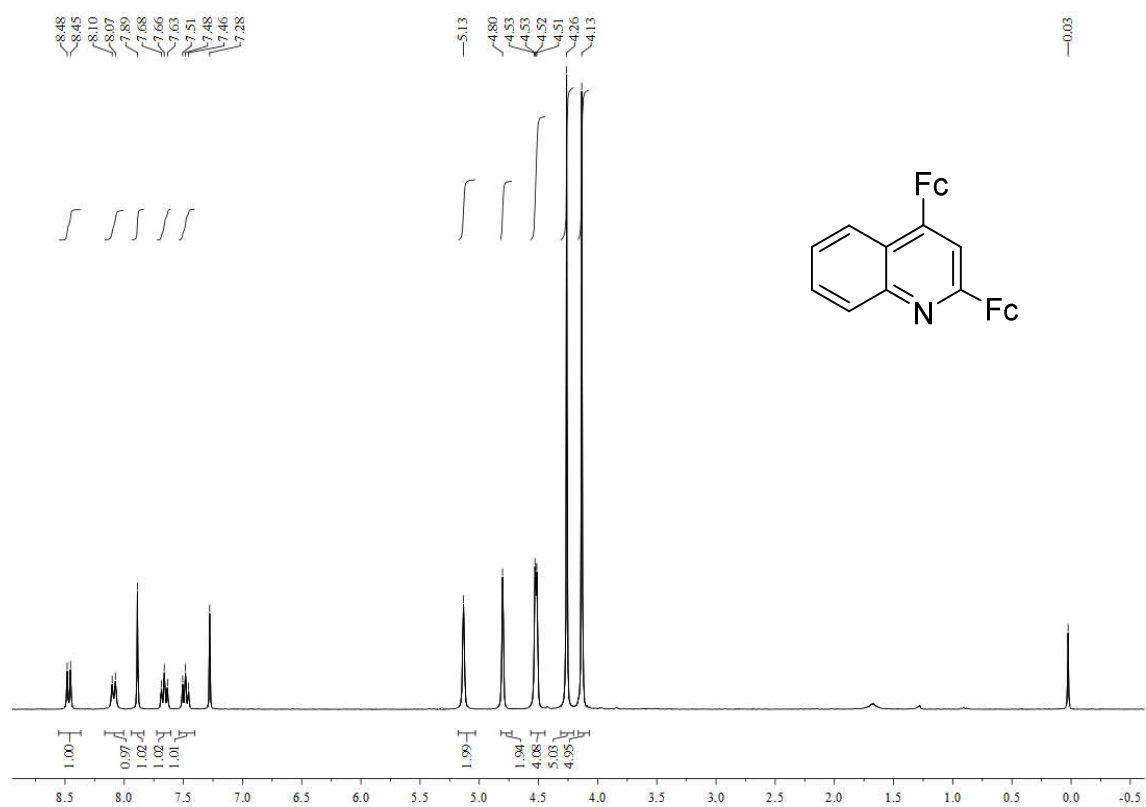

The  $^{13}\text{C}$  NMR of **4t**.

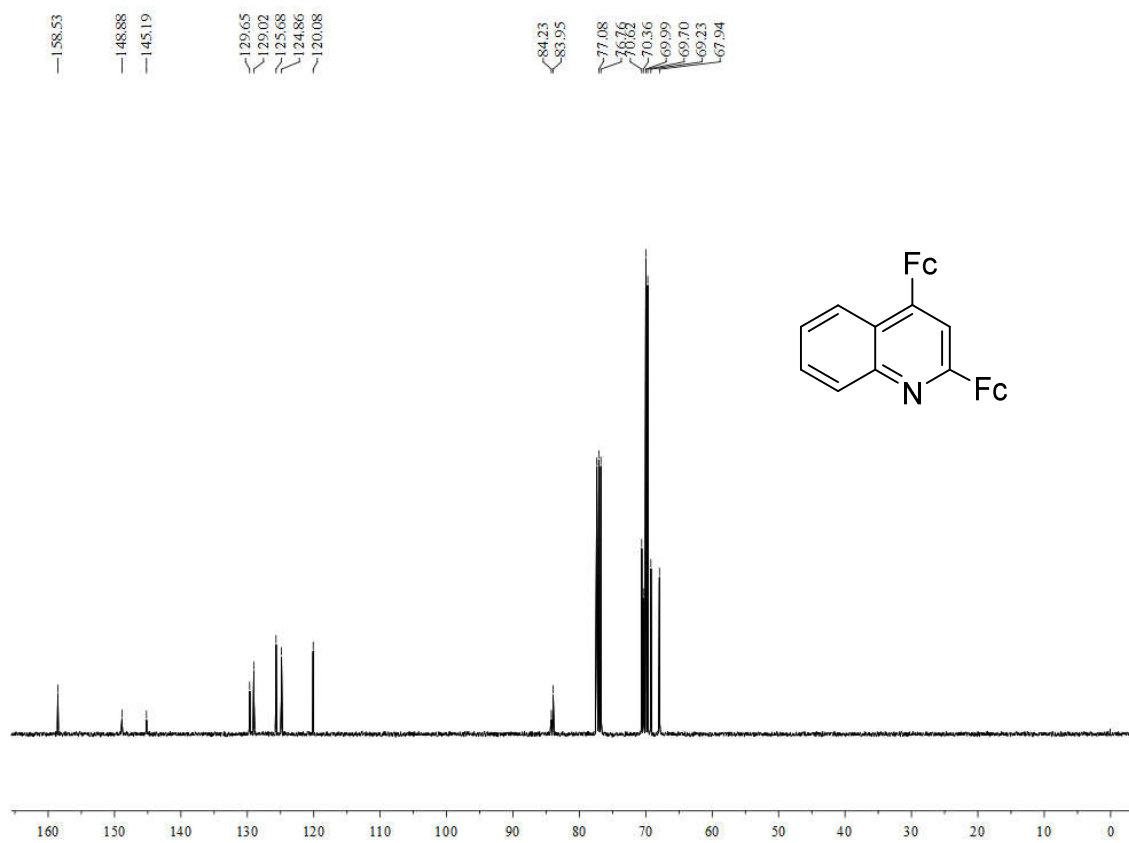

The  $^1\text{H}$  NMR of **6**.

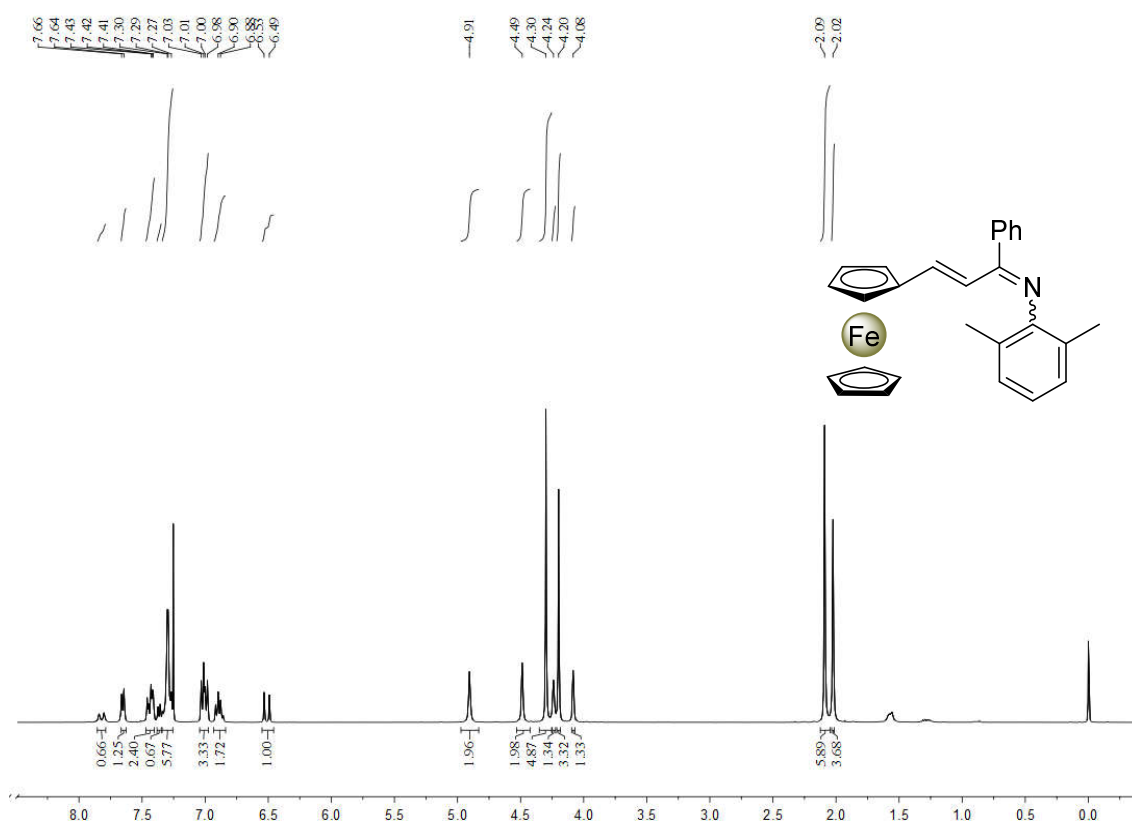

The  $^{13}\text{C}$  NMR of **6**.

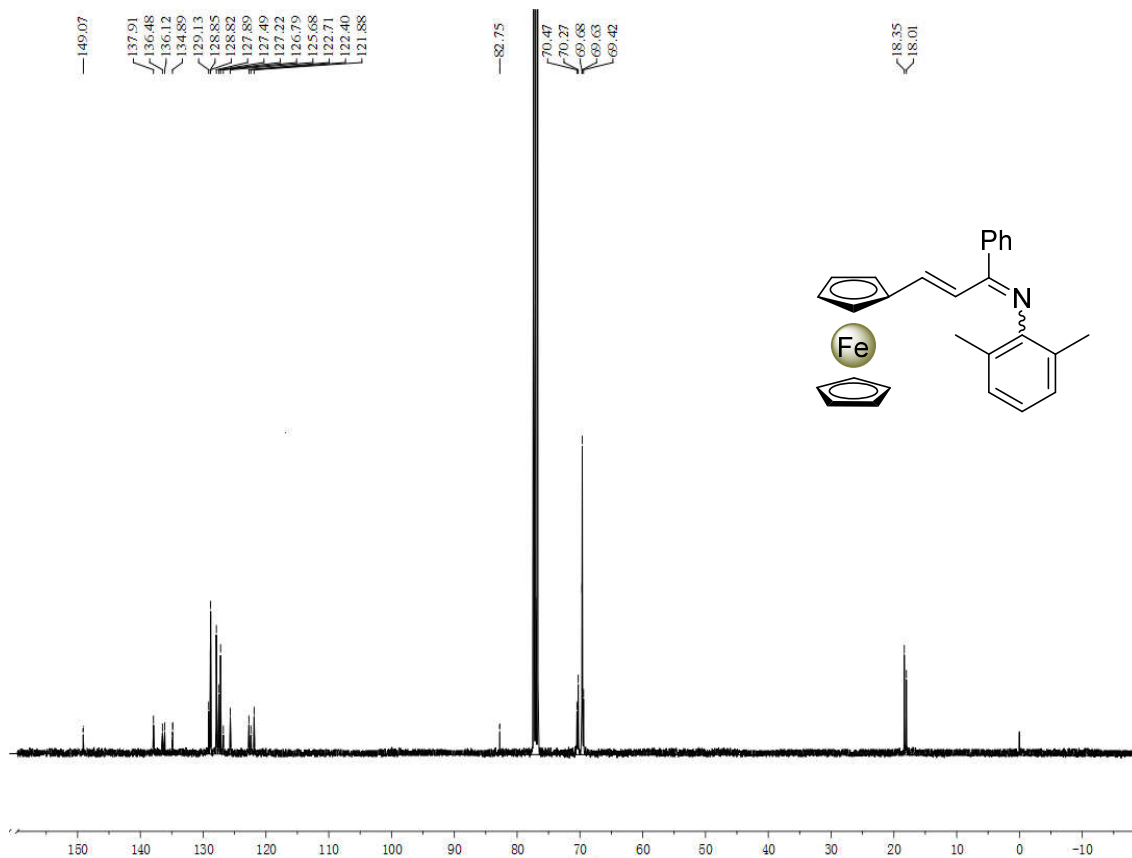

Supplement: c8ra01004h1.pdf [file c8ra01004h1.pdf]
